# Supplementary material for: Ketamine for the treatment of prehospital acute pain: a systematic review of benefit and harm
Source: PubMed Central journal article supplement — BMJ Open. 2020 Nov 24;10(11):e038134. doi: 10.1136/bmjopen-2020-038134 (PMC7689093; doi:10.1136/bmjopen-2020-038134), 2020-11-24
Supplement: bmjopen-2020-038134.draft_revisions.pdf [file bmjopen-2020-038134.draft_revisions.pdf]

# BMJ Open

BMJ Open is committed to open peer review. As part of this commitment we make the peer review history of every article we publish publicly available.

When an article is published we post the peer reviewers' comments and the authors' responses online. We also post the versions of the paper that were used during peer review. These are the versions that the peer review comments apply to.

The versions of the paper that follow are the versions that were submitted during the peer review process. They are not the versions of record or the final published versions. They should not be cited or distributed as the published version of this manuscript.

BMJ Open is an open access journal and the full, final, typeset and author-corrected version of record of the manuscript is available on our site with no access controls, subscription charges or pay-per-view fees (<http://bmjopen.bmj.com>).

If you have any questions on BMJ Open's open peer review process please email [info.bmjopen@bmj.com](mailto:info.bmjopen@bmj.com)

# BMJ Open

## Ketamine for the treatment of prehospital acute pain: a systematic review

|                               |                                                                                                                                                                                                                                                                                                                                                                                                                                                                                                                                                                                                                                                                                                            |
|-------------------------------|------------------------------------------------------------------------------------------------------------------------------------------------------------------------------------------------------------------------------------------------------------------------------------------------------------------------------------------------------------------------------------------------------------------------------------------------------------------------------------------------------------------------------------------------------------------------------------------------------------------------------------------------------------------------------------------------------------|
| Journal:                      | <i>BMJ Open</i>                                                                                                                                                                                                                                                                                                                                                                                                                                                                                                                                                                                                                                                                                            |
| Manuscript ID                 | bmjopen-2020-038134                                                                                                                                                                                                                                                                                                                                                                                                                                                                                                                                                                                                                                                                                        |
| Article Type:                 | Original research                                                                                                                                                                                                                                                                                                                                                                                                                                                                                                                                                                                                                                                                                          |
| Date Submitted by the Author: | 28-Feb-2020                                                                                                                                                                                                                                                                                                                                                                                                                                                                                                                                                                                                                                                                                                |
| Complete List of Authors:     | Sandberg, Mårten; Oslo University Hospital, Air Ambulance Department<br>Hyldmo, Per Kristian; University of Stavanger<br>Kongstad, Poul; Region of Skåne, Lund, Department of Prehospital Care and Disaster Medicine<br>Dahl Friesgaard, Kristian; Prehospital Emergency Medical Service, Research Department, Central Denmark Region<br>Raatinemi, Lasse; Oulu University Hospital<br>Larsen, Robert; Linköping University<br>Magnusson, Vidar; Landspítalinn University Hospital<br>Rognås, Leif; Aarhus University Hospital,<br>Kurola, J; Kuopio University Hospital<br>Rehn, Marius; Oslo University Hospital, Air Ambulance Department<br>Vist, Gunn Elisabeth; Norwegian Institute of Public Health |
| Keywords:                     | ACCIDENT & EMERGENCY MEDICINE, Adult intensive & critical care < ANAESTHETICS, Clinical governance < HEALTH SERVICES ADMINISTRATION & MANAGEMENT, Adult intensive & critical care < INTENSIVE & CRITICAL CARE                                                                                                                                                                                                                                                                                                                                                                                                                                                                                              |
|                               |                                                                                                                                                                                                                                                                                                                                                                                                                                                                                                                                                                                                                                                                                                            |

SCHOLARONE™  
Manuscripts

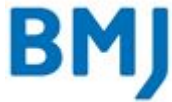

I, the Submitting Author has the right to grant and does grant on behalf of all authors of the Work (as defined in the below author licence), an exclusive licence and/or a non-exclusive licence for contributions from authors who are: i) UK Crown employees; ii) where BMJ has agreed a CC-BY licence shall apply, and/or iii) in accordance with the terms applicable for US Federal Government officers or employees acting as part of their official duties; on a worldwide, perpetual, irrevocable, royalty-free basis to BMJ Publishing Group Ltd ("BMJ") its licensees and where the relevant Journal is co-owned by BMJ to the co-owners of the Journal, to publish the Work in this journal and any other BMJ products and to exploit all rights, as set out in our [licence](#).

The Submitting Author accepts and understands that any supply made under these terms is made by BMJ to the Submitting Author unless you are acting as an employee on behalf of your employer or a postgraduate student of an affiliated institution which is paying any applicable article publishing charge ("APC") for Open Access articles. Where the Submitting Author wishes to make the Work available on an Open Access basis (and intends to pay the relevant APC), the terms of reuse of such Open Access shall be governed by a Creative Commons licence – details of these licences and which [Creative Commons](#) licence will apply to this Work are set out in our licence referred to above.

Other than as permitted in any relevant BMJ Author's Self Archiving Policies, I confirm this Work has not been accepted for publication elsewhere, is not being considered for publication elsewhere and does not duplicate material already published. I confirm all authors consent to publication of this Work and authorise the granting of this licence.

## Ketamine for the treatment of prehospital acute pain: a systematic review

Mårten Sandberg<sup>1,2</sup>, Per Kristian Hyldmo<sup>3,4,5</sup>, Poul Kongstad<sup>6</sup>, Kristian Dahl Friesgaard<sup>7,8</sup>, Lasse Raatiniemi<sup>9,10</sup>, Robert Larsen<sup>11</sup>, Vidar Magnusson<sup>12</sup>, Leif Rognås<sup>13,14,15</sup>, Jouni Kurola<sup>16</sup>, Marius Rehn<sup>2,3,4</sup>, Gunn Elisabeth Vist<sup>17</sup>

<sup>1</sup>Faculty of Medicine, University of Oslo, Oslo, Norway; <sup>2</sup>Division of Prehospital Services, Air Ambulance Department, Oslo University Hospital, Oslo, Norway; <sup>3</sup>Faculty of Health Sciences, University of Stavanger, Stavanger, Norway; <sup>4</sup>Department of Research, Norwegian Air Ambulance Foundation, Oslo, Norway; <sup>5</sup>Trauma Unit, Sørlandet Hospital, Kristiansand, Norway; <sup>6</sup>Department of Prehospital Care and Disaster Medicine, Region of Skåne, Lund, Sweden; <sup>7</sup>Research Department, Prehospital Emergency Medical Service, Central Denmark Region, Aarhus, Denmark; <sup>8</sup>Department of Anaesthesiology, Regional Hospital of Horsens, Denmark; <sup>9</sup>Centre for Prehospital Emergency Care, Oulu University Hospital, Oulu, Finland; <sup>10</sup>Anaesthesia Research group, MRC, Oulu University Hospital and University of Oulu, Finland; <sup>11</sup>Department of Clinical and Experimental Medicine, Division of Surgery, Orthopedics and Oncology, Faculty of Medicine and Health Sciences, University of Linköping, Sweden; <sup>12</sup>Landspítalinn University Hospital, Reykjavik, Iceland; <sup>13</sup>Danish Air Ambulance, Aarhus, Denmark; <sup>14</sup>Department of Anaesthesiology, Aarhus University Hospital, Aarhus, Denmark; <sup>15</sup>Department of Clinical Medicine, Aarhus University; <sup>16</sup>Centre for Prehospital Emergency Medicine, Kuopio University Hospital and University of Eastern Finland; <sup>17</sup>Division of Health Services, Norwegian Institute of Public Health, Oslo, Norway

Short title: Prehospital ketamine

Word count (excl. abstract and references): 4,077

### Corresponding author:

Marius Rehn  
Assoc. Professor/Consultant  
Air Ambulance Department  
Oslo University Hospital  
Sykehusveien 19  
1474 Nordbyhagen  
Norway

Tel.: +47 90784044

E-mail: marius.rehn@norskluftambulanse.no

\*

---

\* The authors declare no conflicts of interest

## Abstract

Background: Few publications have addressed the use of ketamine in analgesic doses (max 0.5 mg/kg ketamine i.v.) in the prehospital setting. We aimed to explore the effect and safety profile of ketamine compared to other analgesic drugs (or no drug) in adult prehospital patients with acute pain.

Methods: We conducted a systematic review of clinical trials assessing the prehospital administration of ketamine in analgesic doses compared to other analgesic drugs or no analgesic treatment in adults. We used the Cochrane and GRADE methodologies and exclusively assessed patient-centred outcomes. Two independent authors screened the trials for eligibility, extracted the data and assessed the risk of bias.

Results: We included eight studies (2,760 patients) in the review. Ketamine (administered i.v. with or without opioids) was compared with various opioids given alone, and intranasal ketamine given with nitrous oxide was compared to nitrous oxide given alone. Four RCTs and one cluster randomized trial included 699 patients. One prospective cohort study included 27 patients, and two retrospective cohort studies included 2,034 patients. Five of the eight studies had high risks of bias. Pain was statistically significant reduced when ketamine was administered, but the number of minor side effects was increased.

Conclusions: This systematic review of the current literature indicates that ketamine is a relatively safe and effective analgesic when administered by prehospital health providers with relevant training.

### Strengths and limitations of the study

- A systematic review where main outcomes was assessed according to the GRADE method
- Studies were heterogeneous in terms of setting, patient population, outcomes and comparators
- Only English and Scandinavian language literature was included

For peer review only

## Introduction

Prehospital acute pain is a frequent symptom and often inadequately managed<sup>1-3</sup>. Several analgesics are administered by prehospital emergency medical services throughout the world without solid evidence of their efficacy and safety. The heterogeneity in pain management strategies may reflect the varying competence levels of providers ranging from technicians with basic training to specially trained physicians. Opioids are most frequently used, but their cerebral, haemodynamic, and respiratory side effects remain a challenge in unstable and undifferentiated prehospital patients<sup>4</sup>. Ketamine is an alternative to opioids. The first report on ketamine was published in 1965<sup>5</sup>, and the drug was approved for clinical use in humans five years later<sup>6</sup>. Ketamine exerts its effects mainly as an N-methyl-D-aspartate antagonist and, depending on the dose, can be considered as an analgesic, a sedative or an anaesthetic drug<sup>7</sup>. The analgesic properties of ketamine were recognized at introduction, but the main focus was its potential role as a sole anaesthetic or an induction agent<sup>8</sup>. The analgesic properties of low-dose ketamine were explored later<sup>9</sup>. Administered ketamine doses in some studies were large enough to cause a temporary loss of consciousness making it difficult to evaluate the clinical value of the purely analgesic effect as distinct from the anaesthetic effect<sup>10</sup>. Ketamine doses for acute pain in the subdissociative range (i.e., doses that are so low that the patient remains conscious) have not been established, but studies suggests that bolus doses of approximately 0.1-0.2 mg/kg i.v. are effective<sup>11</sup>. Relatively high doses, 0.2-0.5 mg/kg i.v., have also been advocated<sup>12 13</sup>. This is further complicated as dose required to cause dissociation varies between patients. In one experimental study, for instance, almost half of the subjects lost consciousness at a dose of 0.25 mg/kg<sup>14</sup>. Titrating the dose, starting at 0.1 mg/kg i.v. with a maximum limit of 0.5 mg/kg i.v., may be a pragmatic approach when the goal is to attain the analgesic effects of ketamine<sup>15</sup>. However, patient weight is often estimated, and the therapeutic range of analgesic drugs remains wide.

One attractive feature for prehospital use of ketamine is its ability to preserve upper airway reflexes. Respiratory rate may increase, as ketamine can cause bronchodilation, while rapid i.v. injection can cause transient apnea<sup>16</sup>. There is a risk of laryngospasm, which may require intubation in a very small number of cases<sup>17</sup>. Airway secretions are not unusual, and some recommend managing the secretions with a small dose of an antisialogogue, e.g., atropine (0.01 mg/kg)<sup>18</sup>.

1  
2  
3 Ketamine can be administered intramuscularly, intranasally and intravenously. Although  
4 originally believed to cause an increase in intracranial pressure (ICP), recent work in critical  
5 care patients indicates that ketamine has little or no impact on ICP. In two studies comparing  
6 ketamine and sufentanil, the authors concluded that ketamine did not affect ICP and that it was  
7 safe to administer to patients with traumatic brain injury (TBI)<sup>19 20</sup>. In another study, ketamine  
8 in conjunction with propofol was administered to TBI patients, and a significant decrease in  
9 ICP was recorded<sup>21</sup>. In one study on children with TBI, a reduction in ICP by up to 30% was  
10 found, and cerebral perfusion was improved<sup>22</sup>. In these studies, ketamine was used in  
11 anaesthetic doses, and the results should be interpreted with caution.  
12  
13  
14  
15  
16  
17  
18  
19

20 Moderate or severe agitation occurs in 5-30% of adult patients; some providers administer  
21 boluses of midazolam to avoid this phenomenon<sup>16</sup>. A randomized controlled trial (RCT)  
22 showed that this practice significantly reduced agitation in adults; however, one trial found that  
23 it did not reduce agitation in children<sup>16 23</sup>.  
24  
25  
26  
27

28 All patients managed prehospital should have their analgesic needs assessed and addressed.  
29 Proper pain relief allows prehospital care providers to meet essential clinical endpoints, e.g.,  
30 facilitating fracture manipulation. Although analgesia should be titrated for the desired effect,  
31 pain relief is frequently suboptimal, possibly due to concerns about adverse effects<sup>24</sup>. Ketamine  
32 may be a useful prehospital analgesic mainly due to its ability to provide excellent analgesic  
33 effects with a lower incidence of respiratory depression than that caused by opioids. These  
34 positive effects have been demonstrated in fracture management<sup>25</sup>, burn treatment<sup>26</sup>, and  
35 traumatic amputation<sup>27</sup>.  
36  
37  
38  
39  
40  
41  
42  
43

44 The aim of this systematic literature review is to explore the effect and safety profile of  
45 ketamine compared to other analgesic drugs (or no drug) in prehospital patients with acute pain.  
46  
47  
48  
49  
50  
51  
52  
53  
54  
55  
56  
57  
58  
59  
60



## Methods

We conducted this systematic review according to the Cochrane Handbook for systematic reviews of interventions<sup>28</sup> and as described in our protocol (PROSPERO registration number CRD42018114399) as specified below.

### Inclusion criteria

We used the following inclusion criteria:

|                     |                                                                                                                                                                                                                                |
|---------------------|--------------------------------------------------------------------------------------------------------------------------------------------------------------------------------------------------------------------------------|
| <b>Population</b>   | Adult patients with acute pain in the prehospital setting                                                                                                                                                                      |
| <b>Intervention</b> | Ketamine                                                                                                                                                                                                                       |
| <b>Comparison</b>   | Other analgesics, no analgesics or ketamine given in another dose or another route of administration or ketamine given in combination with other analgesics                                                                    |
| <b>Outcomes</b>     | Pain reduction, speed of onset, duration of effect, and relevant adverse effects such as mortality, morbidity, anaphylaxis, nausea and vomiting, hypotension, respiratory failure, loss of airway patency, emergence phenomena |

We included all adult patients with acute pain, regardless of aetiology, managed in the prehospital setting. We also sought to identify groups of patients for whom the agents may be of particular benefit or harm. The following study designs were considered eligible for inclusion in the meta-analysis: systematic reviews, RCTs, non-randomized controlled studies, cohort studies with a control group, interrupted time series, and controlled before-and-after studies. Case series were also included for information relating to safety.

### Exclusion criteria

Children and patients with chronic pain and/or patients who used ketamine as part of their regular treatments were not included in this review. We excluded all studies that were not conducted in the prehospital setting, as well as conference abstracts, letters and publications without full texts available.

### Search strategy

An experienced research librarian in collaboration with the authors developed the search strategy based on the inclusion criteria. The following databases were searched from their inception: PubMed, EMBASE, Cochrane Library and Epistemonikos.

The most recent search was conducted on February 15, 2020, and the full search strategy is presented in Appendix 1. The search was limited to the following languages: Danish, English, Norwegian, and Swedish.

The reference lists of the included publications were checked in order to identify relevant articles not found in the original search.

### Study selection

For each step in the review process, no assessor handled publications they had co-authored. MS and either PKH, MR or PK independently assessed all titles and abstracts identified from the search according to the inclusion criteria above. References that were considered potentially relevant were collected, and the full texts were assessed independently by two assessors using the same inclusion criteria. Any disagreement between the initial two assessors was discussed and resolved by all assessors. The process of study selection based on titles and abstracts, study selection based on full texts and risk of bias assessments were conducted using Covidence (Covidence systematic review software, Veritas Health Innovation, Melbourne, Australia. Available at [www.covidence.org](http://www.covidence.org)).

### Assessment of risk of bias

MS and either PKH, MR or PK independently assessed the risk of bias for each of the included studies in accordance with the recommendations by the Cochrane Collaboration<sup>28</sup>. For RCTs, the following items were assessed for risk of bias: i) sequence generation; ii) concealment of allocation; iii) blinding of participants and personnel; iv) blinding of outcome assessor; v) incomplete outcome data; vi) selective outcome reporting; and vii) other risk of bias. For non-randomized controlled trials and other studies with a control group, the following items were also assessed for risk of bias: viii) similarity of baseline characteristics; ix) similarity of baseline outcome data; and x) contamination. All items were rated as either high, unclear or low risk of bias.

### **Data extraction and analysis**

MS and either PKH or PK independently extracted data from each included study. We extracted data pertaining to full references; study design and country in which the study was conducted; characteristics of the population, e.g., number of patients; age; gender; cause of pain; setting and context; type and dose of analgesics given; cadre/competency of the health care personnel who administered the analgesic; comparison/control intervention; attrition; outcomes; and follow-up times.

Dichotomous outcomes are presented as risk ratios (RRs) with 95% confidence intervals (CIs). Continuous outcomes are presented as the mean difference between the groups with 95% CIs. If different scales were used to measure the same outcome, we would have calculated standardized mean difference with a 95% CI. We used Review Manager (RevMan 5.3) software to generate forest plots. Attrition was handled using intention-to-treat analysis. We evaluated statistical heterogeneity using the Q test and  $I^2$  statistic.

### **Grading our confidence in the evidence**

We assessed our confidence in the evidence for each outcome using the Grading of Recommendations Assessment, Development and Evaluation (GRADE) method<sup>29</sup>. Our confidence is presented as high, moderate, low or very low. The evidence across each outcome is assessed by eight criteria. Five criteria lowered our confidence in the evidence: i) risk of bias/methodological limitations; ii) consistency between studies (statistical heterogeneity); iii) directness (similar study participants, intervention, comparator and outcome measures in the included studies to the population, and target interventions and measures); iv) precision of results; and v) reporting bias. Three criteria were used to consider upgrading evidence from observational studies that had not been downgraded: i) strong or very strong association between intervention and outcome; ii) large or very large dose response; and iii) situations where all plausible confounders would have reduced the effect. For questions about the effect of interventions, RCTs started at high confidence, and observational studies started at low confidence.

### **Breach of protocol**

We have made a breach of the protocol; the largest study (Losvik and coworkers) we included also contained treatment data from a few children<sup>34</sup>.

## Results

The systematic literature search identified 1,197 references; we considered 60 to be potentially relevant and assessed those texts in full. We included seven of these studies in the final analysis. In addition, two unique references in the reference lists of the seven publications were assessed and one of the references were also included. Figure 1 shows the flow diagram of the identified references.

The 53 studies that were assessed in full text and excluded are presented in appendix 2 with their reason for exclusion.

### *Characterization of the trials*

The eight included studies were conducted in Australia<sup>30</sup>, Canada<sup>31</sup>, France<sup>32 33</sup>, Iraq<sup>34</sup>, Sweden<sup>35</sup>, the USA<sup>36</sup>, and Vietnam<sup>37</sup>. A total of 2,760 prehospital patients with acute pain were included in these eight studies. Four RCTs<sup>30-33</sup> and one cluster randomized trial<sup>37</sup> included 699 patients. One prospective cohort study<sup>35</sup> included 27 patients. Two retrospective cohort studies<sup>34 36</sup> included 2,034 patients. The largest of these studies, with 1,876 patients, was conducted in the war zones and mine fields of northern and central Iraq<sup>34</sup>. Two authors state that their studies were conducted in rural areas, with one in Australia and one in Vietnam. The latter study included areas with mine fields, and three patients had been involved in mine accidents. This study also included children; however, the vast majority of included patients were likely adults because the mean ages of the groups were 35.5 years and 36.9 years. Therefore, this study was included.

### *Risk of bias assessment*

Our assessments regarding each bias domain is provided in figure 2. Some trials had a high risk of bias, with the main reasons being lack of random sequence generation, lack of allocation concealment and lack of blinding of patients, personnel and outcome assessors.

### *Comparisons*

The included studies covered five comparisons involving ketamine (table 1):

- Ketamine i.v. vs. opioids (morphine<sup>37</sup>, fentanyl<sup>36</sup>, pentazocine<sup>34</sup>) i.v.
- Ketamine i.v. and morphine i.v. vs. only morphine i.v.<sup>30 33 35</sup>
- Ketamine i.v. given as continuous administration vs. ketamine i.v. as single dose<sup>32</sup>

- Ketamine intranasally and nitrous oxide vs. only nitrous oxide<sup>31</sup>
- Ketamine i.v. vs. no analgesia/no medication<sup>34</sup>

We give a short description of the included studies in table 1, while the excluded studies are presented with their reason for exclusion in appendix 2. Note that one study contributed to two comparisons<sup>34</sup>, meaning that 713 patients who received ketamine are compared twice, first with patients who received opioids and again with patients who did not receive analgesic treatment.

### *Ketamine vs. opioids*

A change in pain score was reported in two studies. Bronsky and coworkers<sup>36</sup> used the numeric pain rating scale (NRS), where 1 represents no pain and 10 represents extreme pain, while Tran and coworkers<sup>37</sup> measured the change in pain using the visual analogue scale (VAS) but did not explicitly give a range. Figure 3 shows that both studies reported a greater reduction in pain scores with ketamine than with the opioids fentanyl and morphine.

The main outcome in the study by Losvik and coworkers<sup>34</sup> was the physiological severity score (PSS). The PSS was calculated from the blood pressure, respiratory rate and consciousness level<sup>38</sup>. They reported exactly the same change, at 1.5 (95% CI 1.4 to 1.6), in the PSS for both the ketamine and the pentazocine groups. Hence, no difference was found between the treatment groups.

Adverse events were reported in the Vietnamese study<sup>37</sup>; fewer patients with nausea and vomiting were found in the ketamine group than in the morphine group and fewer patients with agitation were found in the morphine group than in the ketamine group (figure 4).

In the study where ketamine and fentanyl were compared<sup>36</sup>, four adverse events were reported: two patients experienced respiratory compromise, and two patients suffered haemodynamic instability. All four patients were in the fentanyl group.

The change in Glasgow coma scale (GCS) was measured by Bronsky<sup>36</sup> and coworkers and found to be similar for ketamine and fentanyl, MD -0.13 (95% CI -0.33 to 0.07).

### *Ketamine and morphine vs. only morphine*

1  
2  
3 Changes in the pain scores were measured in the Australian study<sup>30</sup> using a scale from 0 to 10  
4 and in the Swedish study<sup>35</sup> using a scale from 1 to 10. For both studies, 10 represented extreme  
5 pain. In the French study<sup>33</sup>, a scale from 0 to 100 was used, and we have transferred this to a 0  
6 to 10 scale in order to include this study in the meta-analysis. Figure 5 shows the change in the  
7 pain score when prehospital patients received both ketamine and morphine compared with  
8 patients who received only morphine. The RCT performed by Jennings and coworkers<sup>30</sup> found  
9 lower pain scores in patients receiving combined ketamine and morphine than in patients  
10 receiving only morphine. The RCT by Galinski and coworkers and the small prospective  
11 cohort<sup>39</sup> showed a trend in the same direction.  
12  
13  
14  
15  
16  
17  
18  
19

20 Adverse events were measured in both studies, and the results are illustrated in figure 6 It is  
21 important to note that the nausea and vomiting are included in the total adverse events in the  
22 RCTs. These results are characterized by few events but indicate that morphine alone may lead  
23 to fewer adverse events than the combination of ketamine and morphine.  
24  
25  
26  
27  
28

29 The RCT by Jennings and coworkers<sup>30</sup> measured the GCS score and found that the median  
30 score was unchanged between initial assessment and the follow-up time, with a median score  
31 of 15 for both groups.  
32  
33  
34

35 The French RCT reported use of fewer boluses of morphine when combined with ketamine (1  
36 bolus (95% CI 0 to 2) compared with 2.3 boluses (95% CI 1.8 to 3.8) when using morphine  
37 alone).  
38  
39  
40  
41

42 The Swedish, prospective cohort by Johansson and coworkers<sup>39</sup> reported a non-significant trend  
43 for shorter treatment time with morphine alone than with ketamine and morphine combined (10  
44 min (95% CI -1.4 to 21.4).  
45  
46  
47  
48

#### 49 *Continuous ketamine administration vs. ketamine given as a bolus*

50 One multicentre RCT conducted in France compared the continuous administration of ketamine  
51 with a bolus dose of ketamine, but both groups also received morphine<sup>32</sup>. Changes in pain were  
52 measured using a VAS from 0 to 10 (worst). and were similar in both groups (VAS -0.6 (95%  
53 CI -1.84 to 0.64)).  
54  
55  
56  
57  
58  
59  
60

1  
2  
3 The main outcome of this study was the amount of additional morphine used (mg/kg) ( $p=0.18$ ),  
4 indicating that there was no difference between the continuous group, at 0.048 (1<sup>st</sup> quartile, 3<sup>rd</sup>  
5 quartile 0.000, 0.150), and the bolus group, at 0.107 (1<sup>st</sup> quartile, 3<sup>rd</sup> quartile 0.052, 0.150). The  
6 duration of care for both groups was 35 minutes. Nausea and vomiting were not reported in  
7 patients in the continuous group but were reported in three patients in the bolus group.  
8  
9

### 10 11 12 13 *Ketamine and nitrous oxide vs. only nitrous oxide*

14  
15 To measure the proportion of patients with a reduction in the pain score of 2 or more points,  
16 Andolfatto and coworkers used a verbal NRS pain score with a range from 0 (no pain at all) to  
17 10 (extreme pain) and evaluated the scores after 15 minutes and 30 minutes<sup>31</sup>. More patients in  
18 the ketamine and nitrous oxide group had a reduction in pain of 2 or more points than those in  
19 the saline and nitrous oxide group at both time points (figure 7).  
20  
21  
22  
23

24  
25 They reported no serious adverse effects in either group, but a considerable number of minor  
26 adverse events, such as feeling of unreality, dizziness, nausea, fatigue, general discomfort,  
27 mood change, hallucination, change in hearing and headache, occurred. Most of these side  
28 effects (52 of 66 events) were reported in the group of patients who received ketamine and  
29 nitrous oxide combined, as shown in figure 8.  
30  
31  
32  
33

### 34 35 36 *Ketamine vs. no analgesic treatment*

37  
38 The retrospectively matched observational study of patients/causalities in the war zone in Iraq  
39 compared the use of ketamine with no analgesic treatment<sup>34</sup>. The main outcome in this study  
40 was the PSS, which was calculated from the blood pressure, respiratory rate and consciousness  
41 level. There was a non-significant trend for lower PSS with ketamine compared with no  
42 analgesics (MD -0.2 (95% CI -0.42 to 0.02)).  
43  
44  
45  
46  
47  
48  
49  
50  
51  
52  
53  
54  
55  
56  
57  
58  
59  
60

**GRADE**

The quality of the main outcomes for the comparisons involving the use of ketamine for the treatment of prehospital acute pain, was assessed according to the GRADE method<sup>29</sup>. The quality of evidence could be downgraded for various reasons (risk of bias, inconsistency, indirectness, imprecision and publication bias). Consequently, the quality of the evidence was classified as high, moderate, low or very low. As described in table 2, we have for many of these outcomes downgraded for study limitations/high risk of bias, or for imprecision because there were few events in many of these studies.

For peer review only



## Discussion

In this systematic review addressing the effect and safety of prehospital administration of ketamine in analgesic doses, we included eight studies with 2,760 patients. The studies were heterogeneous in terms of setting, patient population and outcomes explored, as well as in their comparators, such as i.v. or intranasal ketamine with a variety of opioids or with nitrous oxide. In addition, a single dose of ketamine was compared with ketamine which was administered continuously. Although the evidence base includes five RCTs, five of the eight included studies have a high risk of bias. The RCTs were relatively small studies with 63, 65, 120, 135 and 308 patients included, respectively. The eight studies cover five different comparisons, so the amount of research evidence for each comparison is sparse. Only one of the outcomes in one of the comparisons has been measured in more than one study of similar design, and several of the outcomes has not been assessed in a prehospital study at all. When using GRADE to assess our confidence in the estimates, we more often than not, downgraded for high risk of bias or imprecision due to very few events or wide confidence intervals. Three of the eight included studies are observational studies. They have an initial high risk of bias compared to RCTs due to the lack of randomization. This is acknowledged in GRADE where observational studies start at low quality of evidence. Lack of blinding is a weakness in all of these studies. This becomes a challenge when the main outcome is subjective, pain, and we have downgraded for high risk of bias. However, there is moderate quality of the evidence for the main outcome, change in pain score, for one of the comparisons.

Two of the studies were conducted in Iraq and in Vietnam, respectively, where a number of patients were injured in mine accidents. These studies were the largest studies and included 1,909 patients. It is reasonable to assume that the results from studies conducted in war zones are not directly applicable in civilian settings since the victims tend to be male, relatively young and previously healthy and are not representative of trauma victims in general. The study from Iraq did not report on any of our predefined outcomes.

### *Clinical implications*

Ketamine administered in analgesic doses (0.1-0.2 mg/kg) i.v. appears to be at least as effective as opioids administered alone considering pain reduction. In the study from Iraq, an initial dose of ketamine (0.2 mg/kg) was given in all cases of penetrating trauma and burns, but patients with TBI or blunt injury received only pentazocine<sup>34</sup>. The patients in the study conducted by Tran and coworkers received 0.2-0.3 mg/kg i.v. of ketamine<sup>37</sup>. Four<sup>32 33 35 36</sup> of the other five

1  
2  
3 studies included studies administered ketamine in 0.2-0.3 mg/kg i.v. doses, while in the last i.v.  
4 study<sup>30</sup>, the patients received 10-20 mg i.v. of ketamine. In the study where ketamine was  
5 administered intranasally, the patients received an average of 0.75 mg/kg of ketamine<sup>31</sup>. Hence,  
6 the patients in all studies received appropriate analgesic doses of ketamine.  
7  
8  
9

10  
11 In general, very few adverse effects were reported in the included studies. Analgesic doses of  
12 ketamine resulted in more adverse events than those associated with opioids administered alone,  
13 with the exception of agitation, which was relatively more common in the ketamine group in  
14 the study performed by Tran and coworkers. Bronsky and coworkers reported that two patients  
15 experienced respiratory compromise and two suffered haemodynamic instability. All four  
16 patients were in the fentanyl group.  
17  
18  
19  
20  
21

22  
23 Given the safety profile of ketamine and the results reported in the included studies, it appears  
24 reasonable to suggest that low-dose ketamine for analgesic purposes can be administered safely  
25 during prehospital emergency care when proper indications and contraindications are  
26 identified. Prehospital healthcare providers with a level of training suitable to administer  
27 ketamine – that is personnel that are trained to handle potential adverse effects – must be  
28 identified. None of the included studies had enough power to detect differences in rare events  
29 (adverse events), and the quality of evidence was poor. One of the studies showed an increased  
30 number (pooled) of adverse events in the group receiving ketamine and morphine, indicating  
31 that an improved analgesic effect increases the risk for adverse events. It is unclear whether  
32 adverse events are more likely to occur with opioids than with ketamine. However, it is essential  
33 to note that our recommendations cover ketamine administered in analgesic doses and not in  
34 sedative and anaesthetic doses where advanced skills are required to be able to handle the  
35 patient in an adequate manner.  
36  
37  
38  
39  
40  
41  
42  
43  
44  
45  
46  
47

#### 48 *Studies from other settings*

49 Ketamine is widely applied both prehospitally and in the hospital for rapid sequence induction  
50 of patients who are haemodynamically unstable<sup>40</sup>. In a recent systematic review and meta-  
51 analysis Yousefifard and coworkers included seven studies and pooled the effect estimates of  
52 observational and randomised interventional studies<sup>41</sup>. They concluded that ketamine is an  
53 effective and safe medication in prehospital pain management in trauma patients and can be  
54 considered as an acceptable alternative to opioids. The analgesic effect of low-dose ketamine  
55 is also employed in the hospital. In a recent systematic review and meta-analysis, Karlow and  
56  
57  
58  
59  
60

1  
2  
3 coworkers studied ketamine as an alternative to opioids for acute pain in the emergency  
4 department (ED)<sup>42</sup>. The authors concluded that ketamine can be used an alternative to opioids  
5 in the ED, as they found that ketamine was noninferior to opioids. They also found that the rate  
6 of non-severe adverse effects was higher with ketamine. It is unclear to what extent results from  
7 ED studies can be extrapolated to the prehospital setting. However, when ketamine is  
8 administered by physicians with similar qualifications to patients with comparable  
9 pathophysiology in the two arenas, it seems reasonable to assume that the safety profile of the  
10 drug will be the same in both settings. This is the case for many prehospital services in Europe  
11 and Australia where anaesthesiologists and emergency physicians work in the emergency  
12 medical service. However, it is not obvious that the safety profile of ketamine in the prehospital  
13 setting is independent of the qualifications of the health care provider that administers the drug.  
14 Studies specifically addressing prehospital non-physician care providers administering  
15 ketamine should therefore be conducted. The body of evidence for benefit and possible harm is  
16 limited as few studies have been performed. Future studies need to address all relevant side  
17 effects, the optimal drug dose as well as all relevant outcome measures.

### 30 **Conclusion:**

31 This systematic review of the current literature indicates that ketamine is relatively safe and  
32 effective analgesic when administered by prehospital health providers with relevant training.  
33

### 36 **Acknowledgements**

37 We thank research librarian Jane Kjemtrup Andersen (Viborg Regional Hospital, Denmark) for  
38 developing the search strategies.  
39

### 42 **Funding:**

43 Scandinavian Society of Anaesthesiology and Intensive care medicine (SSAI) funded meetings  
44 and software costs. The Norwegian Air Ambulance Foundation funded publication costs.  
45 Otherwise this research received no further grant from any funding agency in the public,  
46 commercial or not-for-profit sectors.  
47

### 50 **Authors contributions:**

51 MS supervised the process of drafting this manuscript and coordinated all identification, data  
52 extraction and appraisal of included manuscripts. MS and either PKH, MR or PK independently  
53 assessed all potential eligible articles for inclusion. GEV coordinated all methodological  
54

support. All authors are members of the SSAI task force on pre-hospital pain management and participated in design, manuscript drafting and revisions of the manuscript.

## References

1. Jennings PA, Cameron P, Bernard S. Epidemiology of prehospital pain: an opportunity for improvement. *Emerg Med J* 2011;28(6):530-1.
2. Albrecht E, Taffe P, Yersin B, et al. Undertreatment of acute pain (oligoanalgesia) and medical practice variation in prehospital analgesia of adult trauma patients: a 10 yr retrospective study. *Br J Anaesth* 2013;110(1):96-106.
3. Galinski M, Ruscev M, Gonzalez G, et al. Prevalence and management of acute pain in prehospital emergency medicine. *Prehosp Emerg Care* 2010;14(3):334-9.
4. Bounes V, Barniol C, Minville V, et al. Predictors of pain relief and adverse events in patients receiving opioids in a prehospital setting. *Am J Emerg Med* 2011;29(5):512-7.
5. Domino EF, Chodoff P, Corssen G. Pharmacologic effects of Ci-581, a new dissociative anesthetic, in man. *Clin Pharmacol Ther* 1965;6:279-91.
6. Aroni F, Iacovidou N, Dontas I, et al. Pharmacological aspects and potential new clinical applications of ketamine: reevaluation of an old drug. *J Clin Pharmacol* 2009;49(8):957-64.
7. Lodge D, Anis NA, Burton NR. Effects of optical isomers of ketamine on excitation of cat and rat spinal neurones by amino acids and acetylcholine. *Neurosci Lett* 1982;29(3):281-6.
8. Corssen G, Domino EF. Dissociative anesthesia: further pharmacologic studies and first clinical experience with the phencyclidine derivative CI-581. *Anesth Analg* 1966;45(1):29-40.
9. Sadove MS, Shulman M, Hatano S, et al. Analgesic effects of ketamine administered in subdissociative doses. *Anesth Analg* 1971;50(3):452-7.
10. Porter K. Ketamine in prehospital care. *Emerg Med J* 2004;21(3):351-4.
11. White PF, Way WL, Trevor AJ. Ketamine--its pharmacology and therapeutic uses. *Anesthesiology* 1982;56(2):119-36.
12. Svenson JE, Abernathy MK. Ketamine for prehospital use: new look at an old drug. *Am J Emerg Med* 2007;25(8):977-80.
13. Weinbroum AA. A single small dose of postoperative ketamine provides rapid and sustained improvement in morphine analgesia in the presence of morphine-resistant pain. *Anesth Analg* 2003;96(3):789-95.
14. Kochs E, Scharein E, Mollenberg O, et al. Analgesic efficacy of low-dose ketamine. Somatosensory-evoked responses in relation to subjective pain ratings. *Anesthesiology* 1996;85(2):304-14.
15. Wedmore IS, Johnson T, Czarnik J, et al. Pain management in the wilderness and operational setting. *Emerg Med Clin North Am* 2005;23(2):585-601.
16. Craven R. Ketamine. *Anaesthesia* 2007;62 Suppl 1:48-53.
17. Green SM, Johnson NE. Ketamine sedation for pediatric procedures: Part 2, Review and implications. *Ann Emerg Med* 1990;19(9):1033-46.
18. Kye YC, Rhee JE, Kim K, et al. Clinical effects of adjunctive atropine during ketamine sedation in pediatric emergency patients. *Am J Emerg Med* 2012;30(9):1981-5.
19. Bourgoin A, Albanese J, Leone M, et al. Effects of sufentanil or ketamine administered in target-controlled infusion on the cerebral hemodynamics of severely brain-injured patients. *Crit Care Med* 2005;33(5):1109-13.

20. Bourgoin A, Albanese J, Wereszczynski N, et al. Safety of sedation with ketamine in severe head injury patients: comparison with sufentanil. *Crit Care Med* 2003;31(3):711-7.
21. Albanese J, Arnaud S, Rey M, et al. Ketamine decreases intracranial pressure and electroencephalographic activity in traumatic brain injury patients during propofol sedation. *Anesthesiology* 1997;87(6):1328-34.
22. Bar-Joseph G, Guilburd Y, Tamir A, et al. Effectiveness of ketamine in decreasing intracranial pressure in children with intracranial hypertension. *J Neurosurg Pediatr* 2009;4(1):40-6.
23. Sherwin TS, Green SM, Khan A, et al. Does adjunctive midazolam reduce recovery agitation after ketamine sedation for pediatric procedures? A randomized, double-blind, placebo-controlled trial. *Ann Emerg Med* 2000;35(3):229-38.
24. McManus JG, Jr., Sallee DR, Jr. Pain management in the prehospital environment. *Emerg Med Clin North Am* 2005;23(2):415-31.
25. Kennedy RM, Porter FL, Miller JP, et al. Comparison of fentanyl/midazolam with ketamine/midazolam for pediatric orthopedic emergencies. *Pediatrics* 1998;102(4):956-63.
26. McGuinness SK, Wasiak J, Cleland H, et al. A systematic review of ketamine as an analgesic agent in adult burn injuries. *Pain Med* 2011;12(10):1551-8.
27. Bonanno FG. Ketamine in war/tropical surgery (a final tribute to the racemic mixture). *Injury* 2002;33(4):323-7.
28. Higgins JPT, Green S. *Cochrane handbook for systematic reviews of interventions*. The Cochrane Collaboration. 2011.
29. Atkins D, Best D, Briss PA, et al. Grading quality of evidence and strength of recommendations. *BMJ* 2004;328(7454):1490-7.
30. Jennings PA, Cameron P, Bernard S, et al. Morphine and ketamine is superior to morphine alone for out-of-hospital trauma analgesia: a randomized controlled trial. *Ann Emerg Med* 2012;59(6):497-503.
31. Andolfatto G, Innes K, Dick W, et al. Prehospital Analgesia With Intranasal Ketamine (PAIN-K): A Randomized Double-Blind Trial in Adults. *Ann Emerg Med* 2019; 74:241-50
32. Wiel E, Zitouni D, Assez N, et al. Continuous Infusion of Ketamine for Out-of-hospital Isolated Orthopedic Injuries Secondary to Trauma: A Randomized Controlled Trial. *Prehosp Emerg Care* 2015;19(1):10-16.
33. Galinski M, Dolveck F, Combes X, et al. Management of severe acute pain in emergency settings: ketamine reduces morphine consumption. *Am J Emerg Med* 2007;25(4):385-90.
34. Losvik OK, Murad MK, Skjerve E, et al. Ketamine for prehospital trauma analgesia in a low-resource rural trauma system: a retrospective comparative study of ketamine and opioid analgesia in a ten-year cohort in Iraq. *Scand J Trauma Resusc Emerg Med* 2015;23:94.
35. Johansson P, Kongstad P, Johansson A. The effect of combined treatment with morphine sulphate and low-dose ketamine in a prehospital setting. *Scand J Trauma Resusc Emerg Med* 2009;17:61.
36. Bronsky ES, Koola C, Orlando A, et al. Intravenous Low-Dose Ketamine Provides Greater Pain Control Compared to Fentanyl in a Civilian Prehospital Trauma System: A Propensity Matched Analysis. *Prehospital Emerg Care* 2018:1-8.
37. Tran KP, Nguyen Q, Truong XN, et al. A comparison of ketamine and morphine analgesia in prehospital trauma care: a cluster randomized clinical trial in rural Quang Tri province, Vietnam. *Prehosp Emerg Care* 2014;18(2):257-64.

- 1  
2  
3 38. Champion HR, Sacco WJ, Copes WS, et al. A revision of the Trauma Score. *J Trauma*  
4 1989;29(5):623-9.  
5 39. Johansson J, Sjoberg J, Nordgren M, et al. Prehospital analgesia using nasal administration  
6 of S-ketamine--a case series. *Scand J Trauma Resusc Emerg Med* 2013;21:38.  
7 40. Kramer N, Lebowitz D, Walsh M, et al. Rapid Sequence Intubation in Traumatic Brain-  
8 injured Adults. *Cureus* 2018;10(4):e2530.  
9 41. Yousefifard M, Askarian-Amiri S, Rafiei Alavi SN, et al. The Efficacy of Ketamine  
10 Administration in Prehospital Pain Management of Trauma Patients; a Systematic  
11 Review and Meta-Analysis. *Arch Acad Emerg Med* 2020;8(1):e1.  
12 42. Karlow N, Schlaepfer CH, Stoll CRT, et al. A Systematic Review and Meta-analysis of  
13 Ketamine as an Alternative to Opioids for Acute Pain in the Emergency Department.  
14 *Acad Emerg Med* 2018;25(10):1086-97.  
15  
16  
17  
18  
19  
20  
21  
22  
23  
24  
25  
26  
27  
28  
29  
30  
31  
32  
33  
34  
35  
36  
37  
38  
39  
40  
41  
42  
43  
44  
45  
46  
47  
48  
49  
50  
51  
52  
53  
54  
55  
56  
57  
58  
59  
60

Table 1. Summary of included studies

| Reference                                             | Ketamine                                                                                                                                                                                            | Comparison                                                                                                   | Outcomes                                                                                                      |
|-------------------------------------------------------|-----------------------------------------------------------------------------------------------------------------------------------------------------------------------------------------------------|--------------------------------------------------------------------------------------------------------------|---------------------------------------------------------------------------------------------------------------|
| <b>Study design</b>                                   |                                                                                                                                                                                                     |                                                                                                              |                                                                                                               |
| <b>Country</b>                                        |                                                                                                                                                                                                     |                                                                                                              |                                                                                                               |
| Ketamine i.v. versus opioids i.v.                     |                                                                                                                                                                                                     |                                                                                                              |                                                                                                               |
| Bronsky 2018<br>Retrospective<br>cohort<br>USA        | n=79, ketamine 0.3 mg/kg i.v. every 20 min as needed, maximum three doses                                                                                                                           | n=79, fentanyl 2 µg/kg bolus i.v. over 1 to 2 min with additional dose every 10 min as needed                | Change in pain scores, serious adverse events, GCS                                                            |
| Losvik 2015<br>Retrospective<br>cohort<br>Iraq        | n=713, ketamine 0.2 mg/kg i.v., in case of unrest, 5 mg diazepam i.v. During protracted evacuations with repeated ketamine doses, 1 mg atropine was administered. Repeat doses of ketamine allowed. | n=888, pentazocine 0.4 mg/kg i.v. for adults, repeat doses allowed                                           | Change in physiological severity score                                                                        |
| Tran 2014<br>Cluster- RCT<br>Vietnam                  | n=169, ketamine 0.2 to 0.3 mg/kg was administered as slow intermittent i.v. injections                                                                                                              | n=139, morphine administered in one single i.m. dose; 10 mg for adult patients, 5 mg for paediatric patients | Change in pain score, serious adverse events, adverse events, satisfaction, mean treatment time (head trauma) |
| Ketamine and morphine i.v. versus morphine i.v. alone |                                                                                                                                                                                                     |                                                                                                              |                                                                                                               |
| Galinski 2007<br>RCT<br>France                        | n=33, ketamine 0.2 mg/kg i.v. in 3 mg morphine every 5 min if necessary                                                                                                                             | n=32, morphine 3 mg i.v. every 5 min if necessary                                                            | Change in pain score, adverse events                                                                          |
| Jennings 2012<br>RCT<br>Australia                     | n=70, morphine 5 mg i.v. initial dose followed by a ketamine bolus of 10 or 20 mg according to body size, followed by 10 mg ketamine every 3 min thereafter until pain was relieved                 | n=65, morphine 5 mg i.v. initial dose followed by 5 mg i.v. every 5 min until pain was relieved              | Change in pain score, adverse events, GCS                                                                     |
| Johansson 2009<br>Prospective<br>cohort               | n=16, morphine 0.1 mg/kg i.v. followed by ketamine 0.2 mg/kg if pain score $\geq 4$ after 5 min                                                                                                     | n= 11, mg/kg morphine 0.1 mg/kg i.v. followed by                                                             | Change in pain score, adverse event, mean treatment time                                                      |

|                                                                                 |                                                                                                                                                                                                        |                                                                                                                                                                                                                              |                                                    |
|---------------------------------------------------------------------------------|--------------------------------------------------------------------------------------------------------------------------------------------------------------------------------------------------------|------------------------------------------------------------------------------------------------------------------------------------------------------------------------------------------------------------------------------|----------------------------------------------------|
| Sweden                                                                          |                                                                                                                                                                                                        | morphine 0.1 mg/kg if pain score $\geq 4$ after 5 min                                                                                                                                                                        |                                                    |
| Ketamine continuous i.v. administration versus ketamine i.v. one dose           |                                                                                                                                                                                                        |                                                                                                                                                                                                                              |                                                    |
| Wiel 2014<br>RCT<br>France                                                      | n=30, all patients received ketamine 0.2 mg/kg i.v. bolus combined with morphine 0.1 mg/kg i.v. followed by ketamine 0.2 mg/kg/h. Additional morphine 0.05 mg/kg was allowed every 5 min if VAS > 3/10 | n=33, all patients received a ketamine 0.2 mg/kg i.v. bolus combined with morphine 0.1 mg/kg i.v. followed by a saline infusion of the same volume. Additional morphine 0.05 mg/kg was allowed every 5 min if the VAS > 3/10 | Change in pain score, adverse events, satisfaction |
| Intranasal ketamine and inhaled nitrous oxide versus only inhaled nitrous oxide |                                                                                                                                                                                                        |                                                                                                                                                                                                                              |                                                    |
| Andolfatto 2019<br>RCT<br>Canada                                                | n=60, all patients received approx. 0.75 mg/kg intranasal ketamine (30 mg for patients < 50 kg, 50 mg for patients 50-100 kg, 75mg for patients > 100 kg) combined with inhaled nitrous oxide          | n=60, all patients received inhaled nitrous oxide                                                                                                                                                                            | Change in pain score, adverse events, satisfaction |
| Ketamine i.v. versus no analgesic treatment                                     |                                                                                                                                                                                                        |                                                                                                                                                                                                                              |                                                    |
| Losvik 2015<br>Retrospective cohort<br>Iraq                                     | n=713, ketamine 0.2 mg/kg i.v., in case of unrest, 5 mg diazepam i.v. During protracted evacuations with repeated ketamine doses, 1 mg atropine was administered. Repeat doses of ketamine allowed.    | n=275, no analgesic treatment                                                                                                                                                                                                | Change in physiological severity score             |



Table 2. Summary of findings for the comparisons. \***The risk in the intervention group** (and its 95% CI) assumed risk in the comparison group and the **relative effect** of the intervention (and its 95% CI). **GRADE Working Group grades of evidence: High certainty:** We are very confident that the true effect is similar to that of the estimated effect. **Moderate certainty:** We are moderately confident in the effect estimate; the true effect is likely to be close to the estimate of the effect, but there is a possibility that it is substantially different. **Low certainty:** Our confidence in the effect estimate is limited; the true effect may be substantially different from the estimated effect. **Very low certainty:** We have very little confidence in the effect estimate; the true effect is likely to be substantially different from the estimated effect.

### Ketamine compared to opioids for prehospital pain management

**Patient or population:** Prehospital pain management

**Setting:** Prehospital setting in the USA and Vietnam

**Intervention:** Ketamine

**Comparison:** Opioids

| Outcomes                                                   | Anticipated absolute effects* (95% CI)    |                                                                                             | Relative effect (95% CI) | No of participants (studies) | Certainty of the evidence (GRADE) | Comments |
|------------------------------------------------------------|-------------------------------------------|---------------------------------------------------------------------------------------------|--------------------------|------------------------------|-----------------------------------|----------|
|                                                            | Risk with opioids                         | Risk with ketamine                                                                          |                          |                              |                                   |          |
| Change in pain score assessed with VAS                     | The mean change in the pain score was 3.1 | The mean change in the pain score in the intervention group was 0.4 less (0.8 less to 0)    | -                        | 308 (1 RCT)                  | ⊕⊕⊕○<br>MODERATE <sup>a</sup>     |          |
| Change in pain score assessed with NRS scale from: 1 to 10 | The mean change in the pain score was 2.5 | The mean change in pain score in the intervention group was 3 less (3.86 less to 2.14 less) | -                        | 158 (1 observational study)  | ⊕⊕○○<br>LOW                       |          |
| Serious adverse events                                     | 51 per 1,000                              | 0 per 1,000 (0 to 0)                                                                        | Not estimable            | 158 (1 observational study)  | ⊕⊕○○<br>VERY LOW <sup>b</sup>     |          |
| Nausea and vomiting                                        | 194 per 1,000                             | 47 per 1,000 (21 to 101)                                                                    | RR 0.24 (0.11 to 0.52)   | 308 (1 RCT)                  | ⊕⊕⊕○<br>MODERATE <sup>a</sup>     |          |
| Agitation                                                  | 14 per 1,000                              | 112 per 1,000 (27 to 474)                                                                   | RR 7.81 (1.85 to 32.97)  | 308 (1 RCT)                  | ⊕⊕⊕○<br>MODERATE <sup>a</sup>     |          |

Explanations: a. High risk of bias, b: Only 4 events

### Ketamine and morphine compared to only morphine for prehospital pain management

**Patient or population:** Prehospital pain management

**Setting:** Prehospital setting in Sweden, France and Australia

**Intervention:** Ketamine and morphine

**Comparison:** Only morphine

| Outcomes                                  | Anticipated absolute effects* (95% CI) |                                             | Relative effect (95% CI) | No of participants (studies) | Certainty of the evidence (GRADE) | Comments |
|-------------------------------------------|----------------------------------------|---------------------------------------------|--------------------------|------------------------------|-----------------------------------|----------|
|                                           | Risk with only morphine                | Risk with ketamine and morphine             |                          |                              |                                   |          |
| Change in pain scores Scale from: 1 to 10 | The mean change in pain scores was 3.5 | Mean 1.51 lower (3.36 lower to 0.33 higher) | -                        | 135 (2 RCTs)                 | ⊕⊕○○<br>LOW <sup>ab</sup>         |          |

## Ketamine and morphine compared to only morphine for prehospital pain management

**Patient or population:** Prehospital pain management  
**Setting:** Prehospital setting in Sweden, France and Australia  
**Intervention:** Ketamine and morphine  
**Comparison:** Only morphine

| Outcomes                                     | Anticipated absolute effects* (95% CI) |                                            | Relative effect (95% CI) | No of participants (studies) | Certainty of the evidence (GRADE) | Comments                                                  |
|----------------------------------------------|----------------------------------------|--------------------------------------------|--------------------------|------------------------------|-----------------------------------|-----------------------------------------------------------|
|                                              | Risk with only morphine                | Risk with ketamine and morphine            |                          |                              |                                   |                                                           |
| Change in pain scores<br>Scale from: 1 to 10 | The mean change in pain score was 3.1  | Mean 1.3 lower (2.95 lower to 0.35 higher) | -                        | 27 (1 observational study)   | ⊕○○○<br>VERY LOW <sup>a</sup>     |                                                           |
| Serious adverse events                       | Not reported                           |                                            | Not estimable            | -                            | -                                 | None of the 2 studies reported any serious adverse events |
| Total number of adverse events               | 165 per 1 000                          | 468 per 1 000 (289 to 764)                 | RR 2.84 (1.75 to 4.63)   | 200 (2 RCTs)                 | ⊕⊕⊕○<br>MODERATE <sup>b</sup>     |                                                           |

Explanations: a. This cohort only has 27 patients included b, Unclear randomization and open label

## Continuous administration of ketamine compared to ketamine given as a bolus for prehospital pain management

**Patient or population:** Prehospital pain management  
**Setting:** Prehospital setting in France  
**Intervention:** Continuous administration of ketamine  
**Comparison:** Ketamine given as a bolus

| Outcomes                                     | Anticipated absolute effects* (95% CI)    |                                                                                               | Relative effect (95% CI) | No of participants (studies) | Certainty of the evidence (GRADE) | Comments                        |
|----------------------------------------------|-------------------------------------------|-----------------------------------------------------------------------------------------------|--------------------------|------------------------------|-----------------------------------|---------------------------------|
|                                              | Risk with ketamine given as a bolus       | Risk with the continuous administration of ketamine                                           |                          |                              |                                   |                                 |
| Change in pain scores.<br>Scale from 0 to 10 | The mean change in the pain score was 3.1 | The mean change in pain score in the intervention group was 0.6 less (1.84 less to 0.64 more) | -                        | 63 (1 RCT)                   | ⊕⊕○○<br>LOW <sup>a</sup>          |                                 |
| Serious adverse events                       | -                                         | -                                                                                             | not estimable            | (1 study)                    | -                                 | No serious events were reported |
| Nausea and vomiting                          | 91 per 1,000                              | 0 per 1,000 (0 to 0)                                                                          | not estimable            | 63 (1 RCT)                   | ⊕⊕○○<br>VERY LOW <sup>a, b</sup>  |                                 |

Explanations: a. One study included only 63 patients, b. Only 3 events

## Ketamine and nitrous oxide compared to only nitrous oxide for prehospital pain management

**Patient or population:** Prehospital pain management

**Setting:** Prehospital setting in Canada

**Intervention:** Ketamine and nitrous oxide

**Comparison:** Only nitrous oxide

| Outcomes                               | Anticipated absolute effects* (95% CI) |                                      | Relative effect (95% CI) | No of participants (studies) | Certainty of the evidence (GRADE) | Comments |
|----------------------------------------|----------------------------------------|--------------------------------------|--------------------------|------------------------------|-----------------------------------|----------|
|                                        | Risk with only nitrous oxide           | Risk with ketamine and nitrous oxide |                          |                              |                                   |          |
| ≥2 point reduction in pain, 15 minutes | 350 per 1 000                          | 634 per 1 000 (427 to 931)           | RR 1.81 (1.22 to 2.66)   | 120 (1 RCT)                  | ⊕⊕⊕○<br>MODERATE <sup>a</sup>     |          |
| ≥2 point reduction in pain, 30 minutes | 407 per 1 000                          | 758 per 1 000 (534 to 1 000)         | RR 1.86 (1.31 to 2.66)   | 108 (1 RCT)                  | ⊕⊕⊕○<br>MODERATE <sup>a</sup>     |          |
| Serious adverse events                 | 0 per 1 000                            | 0 per 1 000 (0 to 0)                 | Not estimable            | (1 RCT)                      | -                                 |          |
| Total number of adverse events         | 233 per 1 000                          | 866 per 1 000 (541 to 1 000)         | RR 3.71 (2.32 to 5.31)   | 120 (1 RCT)                  | ⊕⊕⊕○<br>MODERATE <sup>a</sup>     |          |
| Number of patients with adverse events | 200 per 1 000                          | 616 per 1 000 (358 to 1 000)         | RR 3.08 (1.79 to 5.31)   | 120 (1 RCT)                  | ⊕⊕⊕○<br>MODERATE <sup>a</sup>     |          |

Explanations: a. Only one study with a total of 120 patients, large effect but unclear blinding

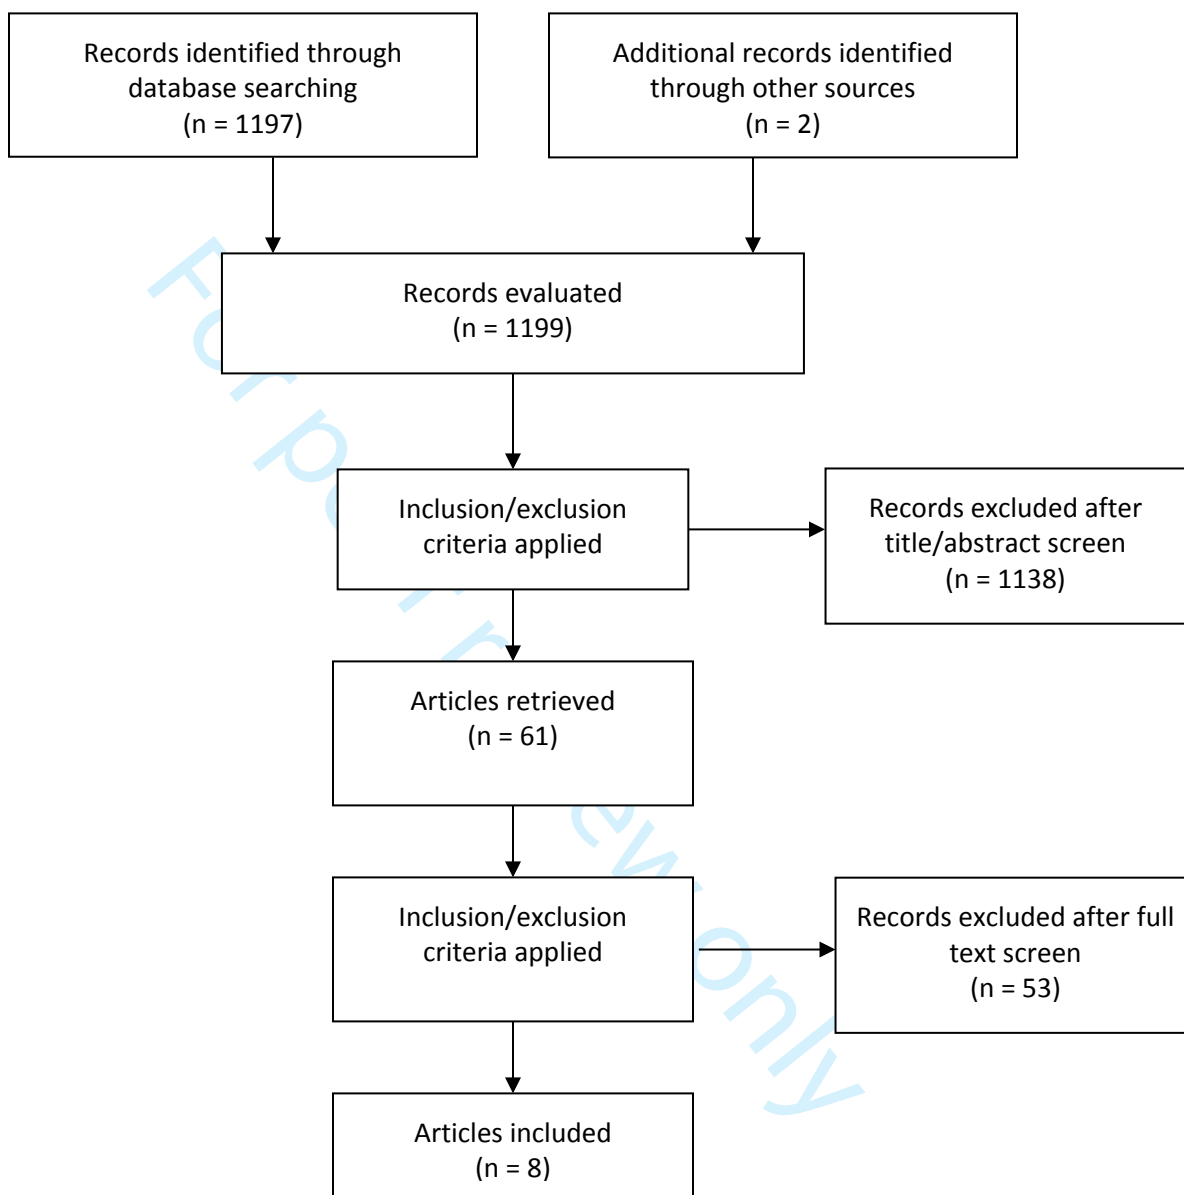

|                 | Random sequence generation (selection bias) | Allocation concealment (selection bias) | Blinding of participants and personnel (performance bias) | Blinding of outcome assessment (detection bias) | Incomplete outcome data (attrition bias) | Selective reporting (reporting bias) | Other bias | Baseline similarities |
|-----------------|---------------------------------------------|-----------------------------------------|-----------------------------------------------------------|-------------------------------------------------|------------------------------------------|--------------------------------------|------------|-----------------------|
| Andolfatto 2019 | +                                           | +                                       | +                                                         |                                                 | +                                        | +                                    | +          | +                     |
| Bronsky 2018    | -                                           | -                                       | +                                                         | -                                               | +                                        | +                                    | +          | +                     |
| Galinski 2007   | +                                           | +                                       |                                                           |                                                 | +                                        | +                                    |            | +                     |
| Jennings 2012   |                                             | +                                       | -                                                         | -                                               | +                                        | +                                    | +          | +                     |
| Johansson 2009  | -                                           | -                                       | -                                                         | -                                               | +                                        | +                                    | +          | +                     |
| Losvik 2015     | -                                           | -                                       | +                                                         | -                                               | +                                        |                                      | +          | -                     |
| Tran 2014       | -                                           | -                                       | -                                                         | -                                               | +                                        | +                                    | +          | +                     |
| Wiel 2014       | +                                           | +                                       | +                                                         | -                                               | +                                        |                                      | +          | +                     |

1  
2  
3  
4  
5  
6  
7  
8  
9  
10  
11  
12  
13  
14  
15  
16  
17  
18  
19  
20  
21  
22  
23  
24  
25  
26  
27  
28  
29  
30  
31  
32  
33  
34  
35  
36  
37  
38  
39  
40  
41  
42  
43  
44  
45  
46  
47  
48  
49  
50  
51  
52  
53  
54  
55  
56  
57  
58  
59  
60

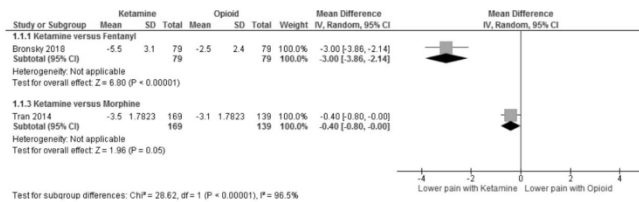

Fig. 3 - Ketamine versus opioids - change in pain score

583x825mm (72 x 72 DPI)

1  
2  
3  
4  
5  
6  
7  
8  
9  
10  
11  
12  
13  
14  
15  
16  
17  
18  
19  
20  
21  
22  
23  
24  
25  
26  
27  
28  
29  
30  
31  
32  
33  
34  
35  
36  
37  
38  
39  
40  
41  
42  
43  
44  
45  
46  
47  
48  
49  
50  
51  
52  
53  
54  
55  
56  
57  
58  
59  
60

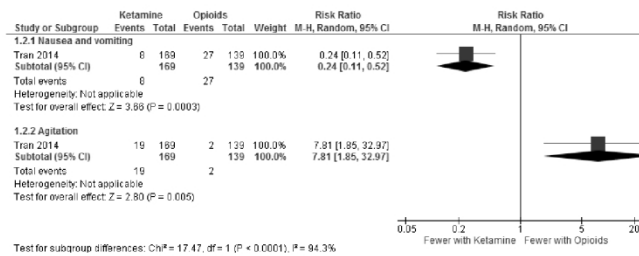

Fig. 4 - Ketamine versus opioids - adverse events

209x297mm (200 x 200 DPI)

1  
2  
3  
4  
5  
6  
7  
8  
9  
10  
11  
12  
13  
14  
15  
16  
17  
18  
19  
20  
21  
22  
23  
24  
25  
26  
27  
28  
29  
30  
31  
32  
33  
34  
35  
36  
37  
38  
39  
40  
41  
42  
43  
44  
45  
46  
47  
48  
49  
50  
51  
52  
53  
54  
55  
56  
57  
58  
59  
60

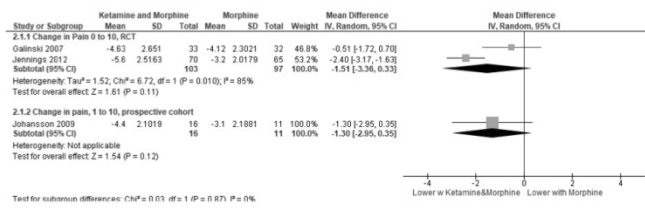

Fig. 5 - Combined ketamine and morphine compared with only morphine - change in pain score

209x296mm (150 x 150 DPI)



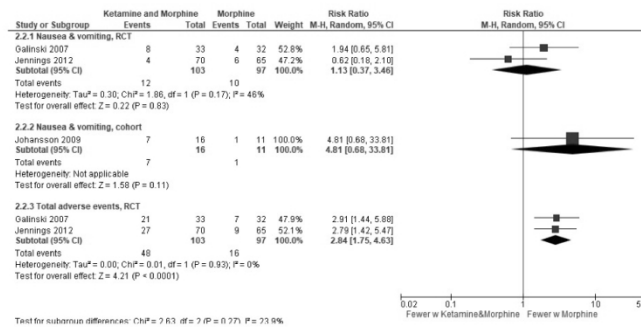

Fig. 6 - Combined ketamine and morphine compared with only morphine - adverse events

209x296mm (150 x 150 DPI)

1  
2  
3  
4  
5  
6  
7  
8  
9  
10  
11  
12  
13  
14  
15  
16  
17  
18  
19  
20  
21  
22  
23  
24  
25  
26  
27  
28  
29  
30  
31  
32  
33  
34  
35  
36  
37  
38  
39  
40  
41  
42  
43  
44  
45  
46  
47  
48  
49  
50  
51  
52  
53  
54  
55  
56  
57  
58  
59  
60

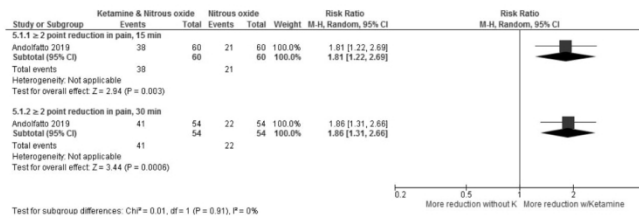

Fig. 7 - Ketamine and N2O vs only N2O - change in pain score

583x825mm (72 x 72 DPI)

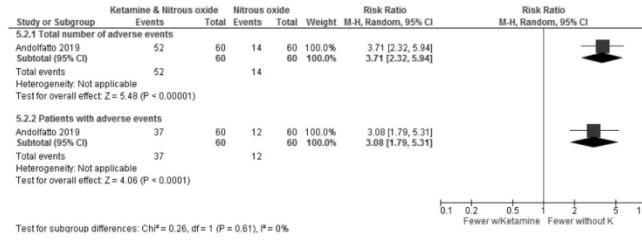

Fig. 8 - Ketamine and N2O vs only N2O - adverse events

583x825mm (72 x 72 DPI)

## SEARCH STRATEGIES

### PUBMED

- #1, "Search ketamine[Text Word]"
- #2, "Search analgesics, ketamine[Pharmacological Action]"
- #3, "Search ketamine[MeSH Terms]"
- #4, "Search (#1 OR #2 OR #3)"
- #5, "Search emergency medical services[MeSH Terms]"
- #6, "Search Ambulances[MeSH Terms]"
- #7, "Search Ambulance\*[Text Word]"
- #8, "Search Prehospital[Text Word]"
- #9, "Search Pre-hospital[Text Word]"
- #10, "Search out of hospital[Text Word]"
- #11, "Search Paramed\*[Text Word]"
- #12, "Search emergency medical technicians[MeSH Terms]"
- #13, "Search (#5 OR #6 OR #7 OR #8 OR #9 OR #10 OR #11 OR #12)"
- #14, "Search Danish[Language]"
- #15, "Search Norwegian[Language]"
- #16, "Search Swedish[Language]"
- #17, "Search English[Language]"
- #18, "Search (#14 OR #15 OR #16 OR #17)"
- #19, "Search (#4 AND #13 AND #18)"
- #20, "Search Animals[MeSH Terms]"
- #21, "Search Humans[MeSH Terms]"
- #22, "Search (#20 NOT #21)"
- #23, "Search (#19 NOT #22)"
- #24, "Search (""xxxx/xx/xx""[Date - Entrez]: ""xxxx/xx/xx""[Date - Entrez])"
- #25, "Search (#23 AND #24)"

### EMBASE

- #1, analgesic agent/
- #2, ketamine.m.\_titl.
- #3, rescue personnel/
- #4, ambulance/
- #5, emergency health service/
- #6, "emergency medical technician\*".ab.ti.
- #7, "emergency responder\*".ab.ti.
- #8, rescue service. ab.ti.
- #9, "Paramed\*". ab.ti.
- #10, "ambulance\*". ab.ti.
- #11, pre-hospital. ab.ti.
- #12, prehospital. ab.ti.
- #13, out-of-hospital. ab.ti.
- #14, or/3-13
- #15, or/1-2
- #16, and/14-15

## Cochrane Library

- #1 MeSH descriptor: [Ketamine] explode all trees  
#2 MeSH descriptor: [Emergency Medical Technicians] explode all trees  
#3 MeSH descriptor: [Ambulances] explode all trees  
#4 paramed\*  
#5 out-of-hospital  
#6, pre-hospital  
#7, prehospital  
#8, ambulance\*  
#9, #2 OR #3 OR #4 OR #5 OR #6 OR #7 OR #8  
#10, #1 AND # 9

## Epistemonikos

(title:(title:(prehospital OR pre-hospital OR out-of-hospital OR ambulance\* OR “emergency medical technicians” OR “emergency medical service\*”) OR abstract:(prehospital OR pre-hospital OR out-of-hospital OR ambulance\* OR “emergency medical technicians” OR “emergency medical service\*”)) AND (title:(ketamin\*) OR abstract:(ketamin\*)))

## Appendix 2

| Excluded reference                                                                                                                                                                                                                                                   | Reason for exclusion                          |
|----------------------------------------------------------------------------------------------------------------------------------------------------------------------------------------------------------------------------------------------------------------------|-----------------------------------------------|
| Allison K, Porter K. Consensus on the pre-hospital approach to burns patient management. <i>Injury</i> 2004; 35: 734-8.                                                                                                                                              | Ketamine not central in the text              |
| Anonymous. Comments on the recommendations of the German Medical Society dated October 20, 2003 on the administration of analgesics by paramedics in emergency situations. <i>Notarzt</i> 2005; 21: 81-82.                                                           | Excluded due to language restrictions         |
| Ansem RP, Hartman JA, Foudraine JF, van Loenen E, Rutten FL. [Analgetic ketamine feasible in ambulance emergency care]. <i>Ned Tijdschr Geneeskd</i> 1994; 138: 2301-4.                                                                                              | Excluded due to language restrictions         |
| Ardeel E. Adverse effects following prehospital use of ketamine by paramedics. <i>Acad Emerg Med</i> 2012; 19: S269-S70.                                                                                                                                             | Letter                                        |
| Aries P, Montelescaut E, Pessey F, Danguy des Deserts M, Giacardi C. Pre-hospital emergency medicine: pain control. <i>Lancet</i> 2016; 387: 747.                                                                                                                    | Ketamine not central in the text              |
| Arroyo-Novoa CM, Figueroa-Ramos MI, Miaskowski C, Padilla G, Paul SM, Rodriguez-Ortiz P, Stotts NA, Puntillo KA. Efficacy of small doses of ketamine with morphine to decrease procedural pain responses during open wound care. <i>Clin J Pain</i> 2011; 27: 561-6. | Patient population did not match the criteria |
| Barrett TW, Schriger DL. Move over morphine: Is ketamine an effective and safe alternative for treating acute pain? Answers to the September 2015 journal club. <i>Ann Emerg Med</i> 2016; 67: 289-94.                                                               | Setting did not match the criteria            |
| Berg C. Out-of-hospital ketamine for pain, agitation, and airway intervention is safe and effective. <i>Ann Emerg Med</i> 2015; 66: S32.                                                                                                                             | Study design did not match the criteria       |
| Bredmose PP, Grier G, Davies GE, Lockey DJ. Pre-hospital use of ketamine in paediatric trauma. <i>Acta Anaesthesiol Scand</i> 2009; 53: 543-5.                                                                                                                       | Patient population did not match the criteria |

|                                                    |                                                                                                                                                                                                                                                                                             |                                               |
|----------------------------------------------------|---------------------------------------------------------------------------------------------------------------------------------------------------------------------------------------------------------------------------------------------------------------------------------------------|-----------------------------------------------|
| 1<br>2<br>3<br>4<br>5<br>6<br>7                    | Bredmose PP, Lockey DJ, Grier G, Watts B, Davies G. Pre-hospital use of ketamine for analgesia and procedural sedation. EMJ 2009; 26: 62-4.                                                                                                                                                 | Study design did not match the criteria       |
| 8<br>9<br>10<br>11<br>12<br>13<br>14<br>15<br>16   | Brokmann JC, Rossaint R, Hirsch F, Beckers SK, Czaplik M, Chowanetz M, Tamm M, Bergrath S. Analgesia by telemedically supported paramedics compared with physician-administered analgesia: A prospective, interventional, multicentre trial. Eur J Pain 2016; 20: 1176-84.                  | Ketamine not central in the text              |
| 17<br>18<br>19<br>20<br>21<br>22<br>23<br>24<br>25 | Butler FK, Kotwal RS, Buckenmaier CC, 3rd, Edgar EP, O'Connor KC, Montgomery HR, Shackelford SA, Gandy JV, 3rd, Wedmore IS, Timby JW, Gross KR, Bailey JA. A triple-option analgesia plan for tactical combat casualty care: TCCC guidelines change 13-04. J Spec Oper Med 2014; 14: 13-25. | Study design did not match the criteria       |
| 26<br>27<br>28                                     | Castle N, Naidoo R. Achieving prehospital analgesia. EMJ 2012; 29: 765-6.                                                                                                                                                                                                                   | Setting did not match the criteria            |
| 29<br>30<br>31<br>32<br>33                         | Castren M, Lindstrom V, Branzell JH, Niemi-Murola L. Prehospital personnel's attitudes to pain management. Scand J Pain 2015; 8: 17-22.                                                                                                                                                     | Study design did not match the criteria       |
| 34<br>35<br>36<br>37<br>38<br>39                   | Chesters A, Webb T. Ketamine for procedural sedation by a doctor-paramedic prehospital care team: a 4-year description of practice. Eur J Emerg Med 2015; 22: 401-6.                                                                                                                        | Patient population did not match the criteria |
| 40<br>41<br>42<br>43<br>44<br>45                   | Corrigan M, Wilson SS, Hampton J. Safety and efficacy of intranasally administered medications in the emergency department and prehospital settings. Am J Health Syst Pharm 2015; 72: 1544-54.                                                                                              | Study design did not match the criteria       |
| 46<br>47<br>48<br>49<br>50<br>51                   | Domonoske B, Gunter R, Love J. Ketamine may increase the risk of PE in selected trauma patients. Crit Care Med 2014; 42: A1610.                                                                                                                                                             | Setting did not match the criteria            |
| 52<br>53<br>54                                     | Domonoske B, Love J. Ketamine reduces the incidence of VTE in selected trauma patients. Crit Care Med 2013; 41: A55.                                                                                                                                                                        | Setting did not match the criteria            |
| 55<br>56<br>57<br>58<br>59<br>60                   | Eidenbenz D, Taffe P, Hugli O, Albrecht E, Pasquier M. A two-year retrospective review of the determinants of pre-hospital analgesia administration by alpine helicopter                                                                                                                    | Study design did not match the criteria       |

|                                                                                                                                                                                                                                                                                                                                                             |                                                                                                                                                                                                                                                                                                                                                                                                                                                                                                                                                                                                                                                                                                                                                                                                                                                                                                                                                                                                                                                                                                                                                                                                                                                                                                                                                                                                                                                                                                                                                                                                                                                                                                                                                                                                                                                                                                                                                                  |                                                                                                                                                                                                                                                                                                                                   |
|-------------------------------------------------------------------------------------------------------------------------------------------------------------------------------------------------------------------------------------------------------------------------------------------------------------------------------------------------------------|------------------------------------------------------------------------------------------------------------------------------------------------------------------------------------------------------------------------------------------------------------------------------------------------------------------------------------------------------------------------------------------------------------------------------------------------------------------------------------------------------------------------------------------------------------------------------------------------------------------------------------------------------------------------------------------------------------------------------------------------------------------------------------------------------------------------------------------------------------------------------------------------------------------------------------------------------------------------------------------------------------------------------------------------------------------------------------------------------------------------------------------------------------------------------------------------------------------------------------------------------------------------------------------------------------------------------------------------------------------------------------------------------------------------------------------------------------------------------------------------------------------------------------------------------------------------------------------------------------------------------------------------------------------------------------------------------------------------------------------------------------------------------------------------------------------------------------------------------------------------------------------------------------------------------------------------------------------|-----------------------------------------------------------------------------------------------------------------------------------------------------------------------------------------------------------------------------------------------------------------------------------------------------------------------------------|
| 1<br>2<br>3<br>4<br>5<br>6<br>7<br>8<br>9<br>10<br>11<br>12<br>13<br>14<br>15<br>16<br>17<br>18<br>19<br>20<br>21<br>22<br>23<br>24<br>25<br>26<br>27<br>28<br>29<br>30<br>31<br>32<br>33<br>34<br>35<br>36<br>37<br>38<br>39<br>40<br>41<br>42<br>43<br>44<br>45<br>46<br>47<br>48<br>49<br>50<br>51<br>52<br>53<br>54<br>55<br>56<br>57<br>58<br>59<br>60 | <p>emergency medical physicians to patients with isolated limb injury. <i>Anaesthesia</i> 2016; 71: 779-87.</p> <p>Ellerton J, Paal P, Brugger H. Prehospital use of ketamine in mountain rescue. <i>EMJ</i> 2009; 26: 760-1.</p> <p>Fisher AD, Rippee B, Shehan H, Conklin C, Mabry RL. Prehospital analgesia with ketamine for combat wounds: a case series. <i>J Spec Oper Med</i> 2014; 14: 11-7.</p> <p>Galinski M, Hoffman L, Bregeaud D, Kamboua M, Ageron FX, Rouanet C, Hubert JC, Istria J, Ruscev M, Tazarourte K, Pevirieri F, Lapostolle F, Adnet F. Procedural sedation and analgesia in trauma patients in an out-of-hospital emergency setting: A prospective multicenter observational study. <i>Prehosp Emerg Care</i> 2018; 22: 497-505.</p> <p>Gausche-Hill M, Brown KM, Oliver ZJ, Sasson C, Dayan PS, Eschmann NM, Weik TS, Lawner BJ, Sahni R, Falck-Ytter Y, Wright JL, Todd K, Lang ES. An evidence-based guideline for prehospital analgesia in trauma. <i>Prehosp Emerg Care</i>; 18 25-34.</p> <p>Green SM, Roback MG, Krauss B, Brown L, McGlone RG, Agrawal D, McKee M, Weiss M, Pitetti RD, Hostetler MA, Wathen JE, Treston G, Garcia Pena BM, Gerber AC, Losek JD. Predictors of emesis and recovery agitation with emergency department ketamine sedation: an individual-patient data meta-analysis of 8,282 children. <i>Ann Emerg Med</i> 2009; 54: 171-80.</p> <p>Guldner GT, Petinaux B, Clemens P, Foster S, Antoine S. Ketamine for procedural sedation and analgesia by nonanesthesiologists in the field: a review for military health care providers. <i>Mil Med</i> 2006; 171: 484-90.</p> <p>Gurnani A, Sharma PK, Rautela RS, Bhattacharya A Analgesia for acute musculoskeletal trauma: low-dose subcutaneous infusion of ketamine. <i>Anaesth Intensive Care</i> 1996; 24: 32-6</p> <p>Henderson L. Special K for special situations. A review of ketamine for prehospital use. <i>JEMS</i> 2016; 41: 58-60.</p> | <p></p> <p>Letter</p> <p>Study design did not match the criteria</p> <p>Patient population did not match the criteria</p> <p>Study design did not match the criteria</p> <p>Patient population did not match the criteria</p> <p>Patient population did not match the criteria</p> <p>Study design did not match the criteria</p> |
|-------------------------------------------------------------------------------------------------------------------------------------------------------------------------------------------------------------------------------------------------------------------------------------------------------------------------------------------------------------|------------------------------------------------------------------------------------------------------------------------------------------------------------------------------------------------------------------------------------------------------------------------------------------------------------------------------------------------------------------------------------------------------------------------------------------------------------------------------------------------------------------------------------------------------------------------------------------------------------------------------------------------------------------------------------------------------------------------------------------------------------------------------------------------------------------------------------------------------------------------------------------------------------------------------------------------------------------------------------------------------------------------------------------------------------------------------------------------------------------------------------------------------------------------------------------------------------------------------------------------------------------------------------------------------------------------------------------------------------------------------------------------------------------------------------------------------------------------------------------------------------------------------------------------------------------------------------------------------------------------------------------------------------------------------------------------------------------------------------------------------------------------------------------------------------------------------------------------------------------------------------------------------------------------------------------------------------------|-----------------------------------------------------------------------------------------------------------------------------------------------------------------------------------------------------------------------------------------------------------------------------------------------------------------------------------|



|                                                    |                                                                                                                                                                                                                                                                                                  |                                         |
|----------------------------------------------------|--------------------------------------------------------------------------------------------------------------------------------------------------------------------------------------------------------------------------------------------------------------------------------------------------|-----------------------------------------|
| 1<br>2<br>3<br>4<br>5<br>6<br>7                    | Hossfeld B, Holstrater S, Bernhard M, Lampl L, Helm M, Kulla M. Prehospital analgesia in adults. <i>Anesthesiol Intensivmed Notfallmed Schmerzther</i> 2016; 51: 84-96.                                                                                                                          | Excluded due to language restrictions   |
| 8<br>9<br>10<br>11<br>12<br>13                     | Iqbal M, Spaight PA, Siriwardena AN. Patients' and emergency clinicians' perceptions of improving pre-hospital pain management: A qualitative study. <i>EMJ</i> 2013; 30: e18.                                                                                                                   | Ketamine not central in the text        |
| 14<br>15<br>16<br>17                               | Jansen A, Boyle M. Prehospital pain relief, where are we now? A review of the literature. <i>Australas J Paramed</i> 2014; 11: 20.                                                                                                                                                               | Ketamine not central in the text        |
| 18<br>19<br>20<br>21<br>22                         | Jennings PA, Cameron P, Bernard S. Ketamine as an analgesic in the pre-hospital setting: a systematic review. <i>Acta Anaesthesiol Scand</i> 2011; 55: 638-43.                                                                                                                                   | Study design did not match the criteria |
| 23<br>24<br>25<br>26<br>27                         | Jennings PA, Cameron P, Bernard S. Determinants of clinically important pain severity reduction in the prehospital setting. <i>EMJ</i> 2012; 29: 333-34.                                                                                                                                         | Ketamine not central in the text        |
| 28<br>29<br>30<br>31<br>32<br>33<br>34<br>35       | Jennings PA, Cameron P, Bernard S, Walker T, Jolley D, Fitzgerald M, Masci K. Long-term pain prevalence and health-related quality of life outcomes for patients enrolled in a ketamine versus morphine for prehospital traumatic pain randomised controlled trial. <i>EMJ</i> 2014; 31: 840-43. | Setting did not match the criteria      |
| 36<br>37<br>38<br>39<br>40<br>41<br>42<br>43<br>44 | Jennings PA, Cameron P, Bernard SA, Walker T, Fitzgerald M, Masci K. Ketamine is superior to morphine alone for the management of traumatic pain in the prehospital setting: A randomised controlled trial. <i>Emerg Med Australas</i> 2012; 24: 19.                                             | Letter                                  |
| 45<br>46<br>47<br>48<br>49<br>50<br>51             | Johansson J, Sjoberg J, Nordgren M, Sandstrom E, Sjoberg F, Zetterstrom H. Prehospital analgesia using nasal administration of S-ketamine--a case series. <i>Scand J Trauma Resusc Emerg Med</i> 2013; 21: 38.                                                                                   | Study design did not match the criteria |
| 52<br>53<br>54<br>55<br>56<br>57<br>58<br>59<br>60 | Kovar JL, Gleisberg GR, Ardeel ER, Basnawi A, Escott MEA. Hemodynamic changes in patients receiving ketamine sedation by emergency medical services. <i>Acad Emerg Med</i> 2012; 19: S87.                                                                                                        | Study design did not match the criteria |

|                                        |                                                                                                                                                                                                                                            |                                         |
|----------------------------------------|--------------------------------------------------------------------------------------------------------------------------------------------------------------------------------------------------------------------------------------------|-----------------------------------------|
| 1<br>2<br>3<br>4<br>5<br>6<br>7        | Lovrinčević M, Kotob F, Santarosa J. Pain management in the trauma setting. <i>Semin Anesth Perioper Med Pain</i> 2005; 24: 34-40.                                                                                                         | Setting did not match the criteria      |
| 8<br>9<br>10<br>11<br>12               | Madeira F, Ferreira P, Lapa T, Tavares E. Prehospital pain management: Do we have to learn more about it? <i>Eur J Anaesthesiol</i> 2013; 30: 203-04.                                                                                      | Ketamine not central in the text        |
| 13<br>14<br>15<br>16<br>17<br>18       | Marland S, Ellerton J, Andolfatto G, Strapazzon G, Thomassen O, Brandner B, Weatherall A, Paal P. Ketamine: Use in anesthesia. <i>CNS Neurosci Ther</i> 2013; 19: 381-89.                                                                  | Setting did not match the criteria      |
| 19<br>20<br>21<br>22<br>23<br>24<br>25 | McKay WP. Intravenous analgesia for out-of-hospital traumatic pain in adults: ketamine gives a greater reduction in pain than morphine but causes more adverse effects. <i>Evid Based Nurs</i> 2013; 16: 58-9.                             | Letter                                  |
| 26<br>27<br>28<br>29<br>30<br>31<br>32 | McQueen C, Crombie N, Cormack S, Wheaton S. Prehospital use of ketamine for analgesia and procedural sedation by critical care paramedics in the UK: A note of caution? <i>EMJ</i> 2014; 31: 1029.                                         | Letter                                  |
| 33<br>34<br>35<br>36<br>37             | Moy R, Wright C. Ketamine for military prehospital analgesia and sedation in combat casualties. <i>J R Army Med Corps</i> 2018; 164: 436-37.                                                                                               | Study design did not match the criteria |
| 38<br>39<br>40                         | Moy RJ, Le Clerc S. Ketamine in prehospital analgesia and anaesthesia. <i>Trends Anaesth Crit Care</i> 2011; 1: 243-45.                                                                                                                    | Study design did not match the criteria |
| 41<br>42<br>43<br>44<br>45<br>46<br>47 | Petz LN, Tyner S, Barnard E, Ervin A, Mora A, Clifford J, Fowler M, Bebartá VS. Prehospital and en route analgesic use in the combat setting: a prospectively designed, multicenter, observational study. <i>Mil Med</i> 2015; 180: 14-18. | Study design did not match the criteria |
| 48<br>49<br>50<br>51                   | Porter K. Ketamine in prehospital care. <i>EMJ</i> 2004; 21: 351-4.                                                                                                                                                                        | Study design did not match the criteria |
| 52<br>53<br>54<br>55<br>56             | Radvansky BM, Puri S, Sifonios AN, Eloy JD, Le V. Ketamine-a narrative review of its uses in medicine. <i>Am J Ther</i> 2016; 23: e1414-e26.                                                                                               | Study design did not match the criteria |
| 57<br>58<br>59<br>60                   | Schauer SG, Mora AG, Maddry JK, Bebartá VS. Multicenter, prospective study of prehospital administration of analgesia in                                                                                                                   | Study design did not match the criteria |

|                                                                                                                                                          |                                                                                                                                                                                                                                                                           |                                               |
|----------------------------------------------------------------------------------------------------------------------------------------------------------|---------------------------------------------------------------------------------------------------------------------------------------------------------------------------------------------------------------------------------------------------------------------------|-----------------------------------------------|
| 1<br>2<br>3<br>4<br>5<br>6                                                                                                                               | the U.S. combat theater of Afghanistan. <i>Prehosp Emerg Care</i> 2017; 21: 744-49.                                                                                                                                                                                       |                                               |
| 7<br>8<br>9<br>10<br>11<br>12<br>13<br>14                                                                                                                | Schonenberg M, Reichwald U, Domes G, Badke A, Hautzinger M. Effects of peritraumatic ketamine medication on early and sustained posttraumatic stress symptoms in moderately injured accident victims. <i>Psychopharmacology (Berl)</i> 2005; 182: 420-5.                  | Study design did not match the criteria       |
| 15<br>16<br>17<br>18                                                                                                                                     | Scott S, Paul B. UK and Victorian, Acute pain guidelines compared. <i>Australas J Paramed</i> 2013; 10: 32.                                                                                                                                                               | Letter                                        |
| 19<br>20<br>21<br>22<br>23                                                                                                                               | Steel A, Wharton R, Bates A, French J, Lewis S, Mackenzie R. Ketamine use in prehospital critical care. <i>EMJ</i> 2008; 25: 618-19.                                                                                                                                      | Letter                                        |
| 24<br>25<br>26<br>27                                                                                                                                     | Svenson JE, Abernathy MK. Ketamine for prehospital use: new look at an old drug. <i>Am J Emerg Med</i> 2007; 25: 977-80.                                                                                                                                                  | Patient population did not match the criteria |
| 28<br>29<br>30                                                                                                                                           | Wedmore IS, Butler FK. Battlefield analgesia in tactical combat casualty care. <i>Wilderness Environ Med</i> 2017; 28: S109-S16.                                                                                                                                          | Study design did not match the criteria       |
| 31<br>32<br>33<br>34                                                                                                                                     | Wood PR. Ketamine: Prehospital and in-hospital use. <i>Trauma</i> 2003; 5: 137-40.                                                                                                                                                                                        | Study design did not match the criteria       |
| 35<br>36<br>37<br>38<br>39<br>40<br>41<br>42<br>43<br>44<br>45<br>46<br>47<br>48<br>49<br>50<br>51<br>52<br>53<br>54<br>55<br>56<br>57<br>58<br>59<br>60 | Zhang M, Cowan T, Smiles JP, Morgan M, Armstrong J, Goswami C, Sewell C. Prehospital analgesic choice in injured patients does not impact on rates of vomiting: Experience from a New South Wales primary retrieval service. <i>Emerg Med Australas</i> 2017; 30: 406-11. | Study design did not match the criteria       |

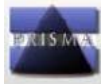

# PRISMA 2009 Checklist

1  
2  
3  
4  
5  
6  
7  
8  
9  
10  
11  
12  
13  
14  
15  
16  
17  
18  
19  
20  
21  
22  
23  
24  
25  
26  
27  
28  
29  
30  
31  
32  
33  
34  
35  
36  
37  
38  
39  
40  
41  
42  
43  
44  
45  
46  
47

| Section/topic                      | #  | Checklist item                                                                                                                                                                                                                                                                                              | Reported on page # |
|------------------------------------|----|-------------------------------------------------------------------------------------------------------------------------------------------------------------------------------------------------------------------------------------------------------------------------------------------------------------|--------------------|
| <b>TITLE</b>                       |    |                                                                                                                                                                                                                                                                                                             |                    |
| Title                              | 1  | Identify the report as a systematic review, meta-analysis, or both.                                                                                                                                                                                                                                         | 1                  |
| <b>ABSTRACT</b>                    |    |                                                                                                                                                                                                                                                                                                             |                    |
| Structured summary                 | 2  | Provide a structured summary including, as applicable: background; objectives; data sources; study eligibility criteria, participants, and interventions; study appraisal and synthesis methods; results; limitations; conclusions and implications of key findings; systematic review registration number. | 2                  |
| <b>INTRODUCTION</b>                |    |                                                                                                                                                                                                                                                                                                             |                    |
| Rationale                          | 3  | Describe the rationale for the review in the context of what is already known.                                                                                                                                                                                                                              | 4                  |
| Objectives                         | 4  | Provide an explicit statement of questions being addressed with reference to participants, interventions, comparisons, outcomes, and study design (PICOS).                                                                                                                                                  | 6                  |
| <b>METHODS</b>                     |    |                                                                                                                                                                                                                                                                                                             |                    |
| Protocol and registration          | 5  | Indicate if a review protocol exists, if and where it can be accessed (e.g., Web address), and, if available, provide registration information including registration number.                                                                                                                               | 6                  |
| Eligibility criteria               | 6  | Specify study characteristics (e.g., PICOS, length of follow-up) and report characteristics (e.g., years considered, language, publication status) used as criteria for eligibility, giving rationale.                                                                                                      | 6                  |
| Information sources                | 7  | Describe all information sources (e.g., databases with dates of coverage, contact with study authors to identify additional studies) in the search and date last searched.                                                                                                                                  | 7                  |
| Search                             | 8  | Present full electronic search strategy for at least one database, including any limits used, such that it could be repeated.                                                                                                                                                                               | A 1                |
| Study selection                    | 9  | State the process for selecting studies (i.e., screening, eligibility, included in systematic review, and, if applicable, included in the meta-analysis).                                                                                                                                                   | 6                  |
| Data collection process            | 10 | Describe method of data extraction from reports (e.g., piloted forms, independently, in duplicate) and any processes for obtaining and confirming data from investigators.                                                                                                                                  | 8                  |
| Data items                         | 11 | List and define all variables for which data were sought (e.g., PICOS, funding sources) and any assumptions and simplifications made.                                                                                                                                                                       | 8                  |
| Risk of bias in individual studies | 12 | Describe methods used for assessing risk of bias of individual studies (including specification of whether this was done at the study or outcome level), and how this information is to be used in any data synthesis.                                                                                      | 7+8                |
| Summary measures                   | 13 | State the principal summary measures (e.g., risk ratio, difference in means).                                                                                                                                                                                                                               | 8                  |
| Synthesis of results               | 14 | Describe the methods of handling data and combining results of studies, if done, including measures of consistency (e.g., I <sup>2</sup> ) for each meta-analysis.                                                                                                                                          | 8                  |

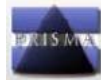

# PRISMA 2009 Checklist

Page 1 of 2

| Section/topic                 | #  | Checklist item                                                                                                                                                                                           | Reported on page # |
|-------------------------------|----|----------------------------------------------------------------------------------------------------------------------------------------------------------------------------------------------------------|--------------------|
| Risk of bias across studies   | 15 | Specify any assessment of risk of bias that may affect the cumulative evidence (e.g., publication bias, selective reporting within studies).                                                             | 8                  |
| Additional analyses           | 16 | Describe methods of additional analyses (e.g., sensitivity or subgroup analyses, meta-regression), if done, indicating which were pre-specified.                                                         | 8                  |
| <b>RESULTS</b>                |    |                                                                                                                                                                                                          |                    |
| Study selection               | 17 | Give numbers of studies screened, assessed for eligibility, and included in the review, with reasons for exclusions at each stage, ideally with a flow diagram.                                          | 9                  |
| Study characteristics         | 18 | For each study, present characteristics for which data were extracted (e.g., study size, PICOS, follow-up period) and provide the citations.                                                             | 10+11+12           |
| Risk of bias within studies   | 19 | Present data on risk of bias of each study and, if available, any outcome level assessment (see item 12).                                                                                                | Fig 2              |
| Results of individual studies | 20 | For all outcomes considered (benefits or harms), present, for each study: (a) simple summary data for each intervention group (b) effect estimates and confidence intervals, ideally with a forest plot. | Fig 3-8            |
| Synthesis of results          | 21 | Present results of each meta-analysis done, including confidence intervals and measures of consistency.                                                                                                  | Fig 3-8            |
| Risk of bias across studies   | 22 | Present results of any assessment of risk of bias across studies (see Item 15).                                                                                                                          | Fig 2              |
| Additional analysis           | 23 | Give results of additional analyses, if done (e.g., sensitivity or subgroup analyses, meta-regression [see Item 16]).                                                                                    | Fig 3-8            |
| <b>DISCUSSION</b>             |    |                                                                                                                                                                                                          |                    |
| Summary of evidence           | 24 | Summarize the main findings including the strength of evidence for each main outcome; consider their relevance to key groups (e.g., healthcare providers, users, and policy makers).                     | 14-16              |
| Limitations                   | 25 | Discuss limitations at study and outcome level (e.g., risk of bias), and at review-level (e.g., incomplete retrieval of identified research, reporting bias).                                            | 14-16              |
| Conclusions                   | 26 | Provide a general interpretation of the results in the context of other evidence, and implications for future research.                                                                                  | 14-16              |
| <b>FUNDING</b>                |    |                                                                                                                                                                                                          |                    |
| Funding                       | 27 | Describe sources of funding for the systematic review and other support (e.g., supply of data); role of funders for the systematic review.                                                               | 16                 |

From: Moher D, Liberati A, Tetzlaff J, Altman DG, The PRISMA Group (2009). Preferred Reporting Items for Systematic Reviews and Meta-Analyses: The PRISMA Statement. PLoS Med 6(6): e1000097. doi:10.1371/journal.pmed1000097

For more information, visit: [www.prisma-statement.org](http://www.prisma-statement.org).

Page 2 of 2

For peer review only - <http://bmjopen.bmj.com/site/about/guidelines.xhtml>

# BMJ Open

## Ketamine for the treatment of prehospital acute pain: a systematic review of benefit and harm

|                                 |                                                                                                                                                                                                                                                                                                                                                                                                                                                                                                                                                                                                                                                                                                            |
|---------------------------------|------------------------------------------------------------------------------------------------------------------------------------------------------------------------------------------------------------------------------------------------------------------------------------------------------------------------------------------------------------------------------------------------------------------------------------------------------------------------------------------------------------------------------------------------------------------------------------------------------------------------------------------------------------------------------------------------------------|
| Journal:                        | <i>BMJ Open</i>                                                                                                                                                                                                                                                                                                                                                                                                                                                                                                                                                                                                                                                                                            |
| Manuscript ID                   | bmjopen-2020-038134.R1                                                                                                                                                                                                                                                                                                                                                                                                                                                                                                                                                                                                                                                                                     |
| Article Type:                   | Original research                                                                                                                                                                                                                                                                                                                                                                                                                                                                                                                                                                                                                                                                                          |
| Date Submitted by the Author:   | 19-Sep-2020                                                                                                                                                                                                                                                                                                                                                                                                                                                                                                                                                                                                                                                                                                |
| Complete List of Authors:       | Sandberg, Mårten; Oslo University Hospital, Air Ambulance Department<br>Hyldmo, Per Kristian; University of Stavanger<br>Kongstad, Poul; Region of Skåne, Lund, Department of Prehospital Care and Disaster Medicine<br>Dahl Friesgaard, Kristian; Prehospital Emergency Medical Service, Research Department, Central Denmark Region<br>Raatinemi, Lasse; Oulu University Hospital<br>Larsen, Robert; Linköping University<br>Magnusson, Vidar; Landspítalinn University Hospital<br>Rognås, Leif; Aarhus University Hospital,<br>Kurola, J; Kuopio University Hospital<br>Rehn, Marius; Oslo University Hospital, Air Ambulance Department<br>Vist, Gunn Elisabeth; Norwegian Institute of Public Health |
| <b>Primary Subject Heading</b>: | Emergency medicine                                                                                                                                                                                                                                                                                                                                                                                                                                                                                                                                                                                                                                                                                         |
| Secondary Subject Heading:      | Anaesthesia, Evidence based practice                                                                                                                                                                                                                                                                                                                                                                                                                                                                                                                                                                                                                                                                       |
| Keywords:                       | ACCIDENT & EMERGENCY MEDICINE, Adult intensive & critical care < ANAESTHETICS, Clinical governance < HEALTH SERVICES ADMINISTRATION & MANAGEMENT, Adult intensive & critical care < INTENSIVE & CRITICAL CARE                                                                                                                                                                                                                                                                                                                                                                                                                                                                                              |
|                                 |                                                                                                                                                                                                                                                                                                                                                                                                                                                                                                                                                                                                                                                                                                            |

SCHOLARONE™  
Manuscripts



I, the Submitting Author has the right to grant and does grant on behalf of all authors of the Work (as defined in the below author licence), an exclusive licence and/or a non-exclusive licence for contributions from authors who are: i) UK Crown employees; ii) where BMJ has agreed a CC-BY licence shall apply, and/or iii) in accordance with the terms applicable for US Federal Government officers or employees acting as part of their official duties; on a worldwide, perpetual, irrevocable, royalty-free basis to BMJ Publishing Group Ltd ("BMJ") its licensees and where the relevant Journal is co-owned by BMJ to the co-owners of the Journal, to publish the Work in this journal and any other BMJ products and to exploit all rights, as set out in our [licence](#).

The Submitting Author accepts and understands that any supply made under these terms is made by BMJ to the Submitting Author unless you are acting as an employee on behalf of your employer or a postgraduate student of an affiliated institution which is paying any applicable article publishing charge ("APC") for Open Access articles. Where the Submitting Author wishes to make the Work available on an Open Access basis (and intends to pay the relevant APC), the terms of reuse of such Open Access shall be governed by a Creative Commons licence – details of these licences and which [Creative Commons](#) licence will apply to this Work are set out in our licence referred to above.

Other than as permitted in any relevant BMJ Author's Self Archiving Policies, I confirm this Work has not been accepted for publication elsewhere, is not being considered for publication elsewhere and does not duplicate material already published. I confirm all authors consent to publication of this Work and authorise the granting of this licence.

## Ketamine for the treatment of prehospital acute pain: a systematic review of benefit and harm

Mårten Sandberg<sup>1,2</sup>, Per Kristian Hyldmo<sup>3,4,5</sup>, Poul Kongstad<sup>6</sup>, Kristian Dahl Friesgaard<sup>7,8</sup>, Lasse Raatiniemi<sup>9,10</sup>, Robert Larsen<sup>11,18</sup>, Vidar Magnusson<sup>12</sup>, Leif Rognås<sup>13,14,15</sup>, Jouni Kurola<sup>16</sup>, Marius Rehn<sup>2,3,4</sup>, Gunn Elisabeth Vist<sup>17</sup>

<sup>1</sup>Faculty of Medicine, University of Oslo, Oslo, Norway; <sup>2</sup>Division of Prehospital Services, Air Ambulance Department, Oslo University Hospital, Oslo, Norway; <sup>3</sup>Faculty of Health Sciences, University of Stavanger, Stavanger, Norway; <sup>4</sup>Department of Research, Norwegian Air Ambulance Foundation, Oslo, Norway; <sup>5</sup>Trauma Unit, Sørlandet Hospital, Kristiansand, Norway; <sup>6</sup>Department of Prehospital Care and Disaster Medicine, Region of Skåne, Lund, Sweden; <sup>7</sup>Research Department, Prehospital Emergency Medical Service, Central Denmark Region, Aarhus, Denmark; <sup>8</sup>Department of Anaesthesiology, Regional Hospital of Horsens, Denmark; <sup>9</sup>Centre for Prehospital Emergency Care, Oulu University Hospital, Oulu, Finland; <sup>10</sup>Anaesthesia Research group, MRC, Oulu University Hospital and University of Oulu, Finland; <sup>11</sup>Department of Anaesthesiology and Intensive Care in Linköping, and Department of Biomedical and Clinical Sciences, Linköping University, Linköping, Sweden; <sup>12</sup>Landsþítalinn University Hospital, Reykjavik, Iceland; <sup>13</sup>Danish Air Ambulance, Aarhus, Denmark; <sup>14</sup>Department of Anaesthesiology, Aarhus University Hospital, Aarhus, Denmark; <sup>15</sup>Department of Clinical Medicine, Aarhus University; <sup>16</sup>Centre for Prehospital Emergency Medicine, Kuopio University Hospital and University of Eastern Finland; <sup>17</sup>Division for Health Services, Norwegian Institute of Public Health, Oslo, Norway; <sup>18</sup>Department of Biomedical and Clinical Sciences, Linköping University, Linköping Sweden

Short title: Prehospital ketamine

Word count (excl. abstract and references): 4,077

### Corresponding author:

Marius Rehn  
Assoc. Professor/Consultant  
Air Ambulance Department  
Oslo University Hospital  
Sykehusveien 19  
1474 Nordbyhagen  
Norway

Tel.: +47 90784044

E-mail: rehmar@snla.no



1  
2  
3  
4  
5  
6  
7  
8  
9  
10  
11  
12  
13  
14  
15  
16  
17  
18  
19  
20  
21  
22  
23  
24  
25  
26  
27  
28  
29  
30  
31  
32  
33  
34  
35  
36  
37  
38  
39  
40  
41  
42  
43  
44  
45  
46  
47  
48  
49  
50  
51  
52  
53  
54  
55  
56  
57  
58  
59  
60

\*

For peer review only

---

\* The authors declare no conflicts of interest

## Abstract

Background: Few publications have addressed prehospital use of ketamine in analgesic doses. We aimed to assess the effect and safety profile of ketamine compared to other analgesic drugs (or no drug) in adult prehospital patients with acute pain.

Methods: A systematic review of clinical trials assessing prehospital administration of ketamine in analgesic doses compared to other analgesic drugs or no analgesic treatment in adults. We searched PubMed, EMBASE, Cochrane Library and Epistemonikos from inception until February 15th, 2020 including relevant articles in English- and Nordic languages. We used the Cochrane and GRADE methodologies and exclusively assessed patient-centred outcomes. Two independent authors screened trials for eligibility, extracted data and assessed risk of bias.

Results: We included eight studies (2,760 patients). Ketamine was compared with various opioids given alone, and intranasal ketamine given with nitrous oxide was compared to nitrous oxide given alone. Four RCTs and one cluster randomized trial included 699 patients. One prospective cohort included 27 patients, and two retrospective cohorts included 2,034 patients. Five of the eight studies had high risks of bias. Pain score with ketamine is probably lower than after opioids as demonstrated in a cluster-RCT (308 patients) and a retrospective cohort (158 patients) study,  $\Delta$ VAS -0.4 (-0.8 to 0.0) and  $\Delta$ NRS -3.0 (-3.86 to -2.14) respectively. Ketamine probably leads to less nausea and vomiting (RR 0.24 (0.11 to 0.52)) but more agitation (RR 7.81 (1.85 to 33)) than opioids.

Conclusions: This systematic literature review finds that ketamine probably reduces pain more than opioids and with less nausea and vomiting but higher risk of agitation. Risk of bias in included studies is high.

Other: SSAI funded meetings and software . The Norwegian Air Ambulance Foundation funded publication. Otherwise this research received no grant from any agency in the public, commercial or not-for-profit sectors. PROSPERO registration number CRD42018114399.

### Strengths and limitations of the study

- A systematic review where main outcomes was assessed according to the GRADE method
- Studies were heterogeneous in terms of setting, patient population, outcomes and comparators
- Only English and Scandinavian language articles were included

For peer review only

## Introduction

Prehospital acute pain is a frequent symptom and often inadequately managed<sup>1-3</sup>. Several analgesics are administered by prehospital emergency medical services throughout the world without solid evidence of their efficacy and safety. The heterogeneity in pain management strategies may reflect the varying competence levels of providers ranging from technicians with basic training to specially trained physicians. Opioids are most frequently used, but their cerebral, haemodynamic, and respiratory side effects remain a potential challenge in unstable and undifferentiated prehospital patients<sup>4</sup>. Ketamine is an alternative to opioids. Ketamine exerts its effects mainly as an N-methyl-D-aspartate antagonist and, depending on the dose, can be considered as an analgesic, a sedative or an anaesthetic drug<sup>5</sup>. One attractive feature for prehospital use of ketamine is its ability to preserve upper airway reflexes. Respiratory rate may increase, and ketamine can cause bronchodilation. While ketamine generally preserves respiratory function, ketamine can cause respiratory depression if given quickly<sup>6</sup>. There is a risk of laryngospasm, which may require intubation in a very small fraction of cases<sup>7</sup>.

Ketamine can be administered in a variety of routes, most commonly intramuscularly, intranasally and intravenously, although per oral and per rectal doses are used in different settings. Although originally believed to cause an increase in intracranial pressure (ICP), recent work in critical care patients indicates that ketamine has little or no impact on ICP. In two studies comparing ketamine and sufentanil, the authors concluded that ketamine did not affect ICP and that it was safe to administer to patients with traumatic brain injury (TBI)<sup>8,9</sup>. In another study, ketamine in conjunction with propofol was administered to TBI patients, and a significant decrease in ICP was recorded<sup>10</sup>. In one study on children with TBI, a reduction in ICP by up to 30% was found, and cerebral perfusion was improved<sup>11</sup>. In these studies, ketamine was used in anaesthetic doses, and the results should be interpreted with caution.

Moderate or severe agitation occurs in 5-30% of adult patients; some clinicians administer boluses of midazolam to avoid this phenomenon<sup>6</sup>. A randomized controlled trial (RCT) showed that this practice significantly reduced agitation in adults; however, one trial found that it did not reduce agitation in children<sup>6,12</sup>.

Proper pain relief allows prehospital care providers to meet essential clinical endpoints, e.g., facilitating fracture manipulation. Although analgesia should be titrated for the desired effect,

1  
2  
3 pain relief is frequently suboptimal, possibly due to concerns about adverse events<sup>13</sup>. Ketamine  
4 may be a useful prehospital analgesic mainly due to its ability to provide excellent analgesic  
5 effects with a lower incidence of respiratory depression than that caused by opioids. These  
6 positive effects have been demonstrated in fracture management<sup>14</sup>, burn treatment<sup>15</sup>, and  
7 traumatic amputation<sup>16</sup>.  
8  
9

10  
11  
12  
13 The aim of this systematic literature review is to explore the benefit and harm of ketamine  
14 compared to other analgesic drugs (or no drug) in prehospital patients with acute pain.  
15  
16  
17  
18  
19  
20  
21  
22  
23  
24  
25  
26  
27  
28  
29  
30  
31  
32  
33  
34  
35  
36  
37  
38  
39  
40  
41  
42  
43  
44  
45  
46  
47  
48  
49  
50  
51  
52  
53  
54  
55  
56  
57  
58  
59  
60

For peer review only

## Methods

We conducted this systematic review according to the Cochrane Handbook for systematic reviews of interventions<sup>17</sup> and as described in our protocol (PROSPERO registration number CRD42018114399) as specified below.

### Inclusion criteria

We used the following inclusion criteria:

|                     |                                                                                                                                                                                                                                                             |
|---------------------|-------------------------------------------------------------------------------------------------------------------------------------------------------------------------------------------------------------------------------------------------------------|
| <b>Population</b>   | Adult patients (18 years of age or older) with acute pain in the prehospital setting                                                                                                                                                                        |
| <b>Intervention</b> | Ketamine                                                                                                                                                                                                                                                    |
| <b>Comparison</b>   | Other analgesics, no analgesics or ketamine given in another dose or another route of administration or ketamine given in combination with other analgesics                                                                                                 |
| <b>Outcomes</b>     | Pain reduction, speed of onset, duration of effect, and relevant adverse events such as mortality, morbidity, anaphylaxis, nausea and vomiting, hypotension, respiratory failure, loss of airway patency, emergence phenomena (as defined by study authors) |

We included all adult patients (18 years of age or older) with acute pain, regardless of aetiology, managed in the prehospital setting. We also sought to identify adverse effects that are not previously reported. The following study designs were considered eligible for inclusion in the meta-analysis: Randomized Controlled Trials (RCTs), non-randomized controlled studies, cohort studies with a control group, interrupted time series, and controlled before-and-after studies. Case series were also included for information relating to safety. Systematic reviews of high quality answering to our inclusion criteria, were evaluated for eligible studies. Other systematic reviews would have been used to check for relevant references.

### Exclusion criteria

Children (younger than 18 years of age) and patients with chronic pain and/or patients who used ketamine as part of their regular treatments were not included in this review. We excluded all studies that were not conducted in the prehospital setting, as well as conference abstracts, letters and publications without full texts available.

## Search strategy

An experienced research librarian in collaboration with the authors developed the search strategy based on the inclusion criteria. The following databases were searched from their inception: PubMed, EMBASE, Cochrane Library and Epistemonikos.

The most recent search was conducted on February 15, 2020, and the full search strategy is presented in Appendix 1. The search was limited to the following languages: Danish, English, Finnish, Icelandic, Norwegian, and Swedish.

The reference lists of the included publications were checked in order to identify relevant articles not found in the original search.

## Study selection

For each step in the review process, no assessor handled publications they had co-authored. MS and either PKH, MR or PK independently assessed all titles and abstracts identified from the search according to the inclusion criteria above. References that were considered potentially relevant were collected, and the full text articles were assessed independently by two assessors using the same inclusion criteria. Any disagreement between the initial two assessors was discussed and resolved by all assessors. The process of study selection based on titles and abstracts, study selection based on full text articles and risk of bias assessments were conducted using Covidence (Covidence systematic review software, Veritas Health Innovation, Melbourne, Australia. Available at [www.covidence.org](http://www.covidence.org)).

## Assessment of risk of bias

MS and either PKH, MR or PK independently assessed the risk of bias for each of the included studies in accordance with the recommendations by the Cochrane Collaboration<sup>17</sup>. For RCTs, the following items were assessed for risk of bias: i) sequence generation; ii) concealment of allocation; iii) blinding of participants and personnel; iv) blinding of outcome assessor; v) incomplete outcome data; vi) selective outcome reporting; and vii) other risk of bias. For non-randomized controlled trials and other studies with a control group, the following items were also assessed for risk of bias: viii) similarity of baseline characteristics; ix) similarity of baseline

1  
2  
3 outcome data; and x) contamination. All items were rated as either high, unclear or low risk of  
4 bias.  
5  
6  
7

### 8 **Data extraction**

9  
10 MS and either PKH or PK independently extracted data from each included study. We extracted  
11 data pertaining to full references; study design and country in which the study was conducted;  
12 characteristics of the population, e.g., number of patients; age; gender; cause of pain; setting  
13 and context; type and dose of analgesics given; cadre/competency of the health care personnel  
14 who administered the analgesic; comparison/control intervention; attrition; outcomes; and  
15 follow-up times. We did not contact any study investigators to obtain information not described  
16 in the original articles.  
17  
18  
19  
20  
21  
22

23  
24 The process of study selection based on titles and abstracts, study selection based on full text  
25 articles as well as risk of bias assessments were conducted using Covidence.  
26  
27  
28

### 29 **Statistical analysis**

30  
31 Dichotomous outcomes are presented as risk ratios (RRs) with 95% confidence intervals (CIs).  
32 Continuous outcomes are presented as the mean difference between the groups with 95% CIs.  
33 If different scales were used to measure the same outcome, we would have calculated  
34 standardized mean difference with a 95% CI. We used Review Manager (RevMan 5.3) software  
35 to generate forest plots. Attrition was handled using intention-to-treat analysis. We evaluated  
36 statistical heterogeneity using the Q test and I<sup>2</sup>-statistic. Analysis was by inverse variance and  
37 random effects methods. Zero events were presented descriptively.  
38  
39  
40  
41  
42  
43  
44

### 45 **Grading our confidence in the evidence**

46 We assessed our confidence in the evidence for each outcome using the Grading of  
47 Recommendations Assessment, Development and Evaluation (GRADE) method<sup>18</sup>. Our  
48 confidence is presented as high, moderate, low or very low. The evidence across each outcome  
49 is assessed by eight criteria. Five criteria lowered our confidence in the evidence: i) risk of bias/  
50 methodological limitations; ii) consistency between studies (statistical heterogeneity); iii)  
51 directness (similar study participants, intervention, comparator and outcome measures in the  
52 included studies to the population, and target interventions and measures); iv) precision of  
53 results; and v) reporting bias. Three criteria were used to consider upgrading evidence from  
54 observational studies that had not been downgraded: i) strong or very strong association  
55  
56  
57  
58  
59  
60



1  
2  
3 between intervention and outcome; ii) large or very large dose response; and iii) situations  
4 where all plausible confounders would have reduced the effect. For questions about the effect  
5 of interventions, RCTs started at high confidence, and observational studies started at low  
6 confidence.  
7  
8  
9

### 10 11 **Breach of protocol**

12 We did make a breach of protocol; the largest study (Losvik et al.) we included, also contained  
13 treatment data from a few children<sup>19</sup>.  
14  
15  
16

### 17 18 **Patient and public involvement**

19 The development of the research question and outcome measures were informed by studies  
20 indicating that prehospital acute pain is a frequent symptom and often inadequately managed<sup>1-</sup>  
21 <sup>3</sup>. No patients were directly involved in the design or conduct of this study.  
22 The results will be disseminated as a part of a Scandinavian society of anaesthesiology and  
23 intensive care medicine (SSAI) guideline on pre-hospital pain management.  
24  
25  
26  
27  
28  
29  
30  
31  
32  
33  
34  
35  
36  
37  
38  
39  
40  
41  
42  
43  
44  
45  
46  
47  
48  
49  
50  
51  
52  
53  
54  
55  
56  
57  
58  
59  
60

## Results

The systematic literature search identified 1,197 references; we considered 60 to be potentially relevant and assessed those publications in full. We included seven of these studies in the final analysis. In addition, two unique references in the reference lists of the seven publications were assessed and one of the references was also included. Figure 1 shows the flow diagram of the identified references. The 53 studies that were assessed in full text articles and excluded are presented in appendix 2 with the reason for their exclusion.

### *Characterization of the trials*

The eight included studies were conducted in Australia<sup>20</sup>, Canada<sup>21</sup>, France<sup>22 23</sup>, Iraq<sup>19</sup>, Sweden<sup>24</sup>, the USA<sup>25</sup>, and Vietnam<sup>26</sup>. A total of 2,760 prehospital patients with acute pain were included in these eight studies. Four RCTs<sup>20-23</sup> and one cluster randomized trial<sup>26</sup> included 699 patients. One prospective cohort study<sup>24</sup> included 27 patients. Two retrospective cohort studies<sup>19 25</sup> included 2,034 patients. The largest of these studies, with 1,876 patients, was conducted in the war zones and mine fields of northern and central Iraq<sup>19</sup>. Two authors stated that their studies were conducted in rural areas, with one in Australia and one in Vietnam. The latter study included areas with mine fields, and three patients had been involved in mine accidents. This study also included children; however, the vast majority of included patients were probably adults because the mean ages of the groups were 35.5 years and 36.9 years. Therefore, this study was included. The reported time frame was similar in all studies; i.e. from drug administration to admission to hospital.

Table 1. Summary of included studies

| Reference                                             | Ketamine                                                                                                                                                                                            | Comparison                                                                                                   | Outcomes                                                                                                      |
|-------------------------------------------------------|-----------------------------------------------------------------------------------------------------------------------------------------------------------------------------------------------------|--------------------------------------------------------------------------------------------------------------|---------------------------------------------------------------------------------------------------------------|
| <b>Study design</b>                                   |                                                                                                                                                                                                     |                                                                                                              |                                                                                                               |
| <b>Country</b>                                        |                                                                                                                                                                                                     |                                                                                                              |                                                                                                               |
| Ketamine i.v. versus opioids i.v.                     |                                                                                                                                                                                                     |                                                                                                              |                                                                                                               |
| Bronsky 2018<br>Retrospective cohort<br>USA           | n=79, ketamine 0.3 mg/kg i.v. every 20 min as needed, maximum three doses                                                                                                                           | n=79, fentanyl 2 µg/kg bolus i.v. over 1 to 2 min with additional dose every 10 min as needed                | Change in pain scores, serious adverse events, GCS                                                            |
| Losvik 2015<br>Retrospective cohort<br>Iraq           | n=713, ketamine 0.2 mg/kg i.v., in case of unrest, 5 mg diazepam i.v. During protracted evacuations with repeated ketamine doses, 1 mg atropine was administered. Repeat doses of ketamine allowed. | n=888, pentazocine 0.4 mg/kg i.v. for adults, repeat doses allowed                                           | Change in physiological severity score                                                                        |
| Tran 2014<br>Cluster- RCT<br>Vietnam                  | n=169, ketamine 0.2 to 0.3 mg/kg was administered as slow intermittent i.v. injections                                                                                                              | n=139, morphine administered in one single i.m. dose; 10 mg for adult patients, 5 mg for paediatric patients | Change in pain score, serious adverse events, adverse events, satisfaction, mean treatment time (head trauma) |
| Ketamine and morphine i.v. versus morphine i.v. alone |                                                                                                                                                                                                     |                                                                                                              |                                                                                                               |
| Galinski 2007<br>RCT<br>France                        | n=33, ketamine 0.2 mg/kg i.v. in 3 mg morphine every 5 min if necessary                                                                                                                             | n=32, morphine 3 mg i.v. every 5 min if necessary                                                            | Change in pain score, adverse events                                                                          |

|                                                                                 |                                                                                                                                                                                                        |                                                                                                                                                                                                                              |                                                          |
|---------------------------------------------------------------------------------|--------------------------------------------------------------------------------------------------------------------------------------------------------------------------------------------------------|------------------------------------------------------------------------------------------------------------------------------------------------------------------------------------------------------------------------------|----------------------------------------------------------|
| Jennings<br>2012<br>RCT<br>Australia                                            | n=70, morphine 5 mg i.v. initial dose followed by a ketamine bolus of 10 or 20 mg according to body size, followed by 10 mg ketamine every 3 min thereafter until pain was relieved                    | n=65, morphine 5 mg i.v. initial dose followed by 5 mg i.v. every 5 min until pain was relieved                                                                                                                              | Change in pain score, adverse events, GCS                |
| Johansson<br>2009<br>Prospective cohort<br>Sweden                               | n=16, morphine 0.1 mg/kg i.v. followed by ketamine 0.2 mg/kg if pain score $\geq 4$ after 5 min                                                                                                        | n= 11, mg/kg morphine 0.1 mg/kg i.v. followed by morphine 0.1 mg/kg if pain score $\geq 4$ after 5 min                                                                                                                       | Change in pain score, adverse event, mean treatment time |
| Ketamine continuous i.v. administration versus ketamine i.v. one dose           |                                                                                                                                                                                                        |                                                                                                                                                                                                                              |                                                          |
| Wiel 2014<br>RCT<br>France                                                      | n=30, all patients received ketamine 0.2 mg/kg i.v. bolus combined with morphine 0.1 mg/kg i.v. followed by ketamine 0.2 mg/kg/h. Additional morphine 0.05 mg/kg was allowed every 5 min if VAS > 3/10 | n=33, all patients received a ketamine 0.2 mg/kg i.v. bolus combined with morphine 0.1 mg/kg i.v. followed by a saline infusion of the same volume. Additional morphine 0.05 mg/kg was allowed every 5 min if the VAS > 3/10 | Change in pain score, adverse events, satisfaction       |
| Intranasal ketamine and inhaled nitrous oxide versus only inhaled nitrous oxide |                                                                                                                                                                                                        |                                                                                                                                                                                                                              |                                                          |
| Andolfatto<br>2019<br>RCT                                                       | n=60, all patients received approx. 0.75 mg/kg intranasal ketamine (30 mg                                                                                                                              | n=60, all patients received inhaled nitrous oxide                                                                                                                                                                            | Change in pain score, adverse events, satisfaction       |

|                                                |                                                                                                                                                                                                                          |                                  |                                              |
|------------------------------------------------|--------------------------------------------------------------------------------------------------------------------------------------------------------------------------------------------------------------------------|----------------------------------|----------------------------------------------|
| Canada                                         | for patients < 50 kg, 50 mg<br>for patients 50-100 kg,<br>75mg for patients > 100 kg)<br>combined with inhaled<br>nitrous oxide                                                                                          |                                  |                                              |
| Ketamine i.v. versus no analgesic treatment    |                                                                                                                                                                                                                          |                                  |                                              |
| Losvik 2015<br>Retrospective<br>cohort<br>Iraq | n=713, ketamine 0.2 mg/kg<br>i.v., in case of unrest, 5 mg<br>diazepam i.v. During<br>protracted evacuations<br>with repeated ketamine<br>doses, 1 mg atropine was<br>administered. Repeat doses<br>of ketamine allowed. | n=275, no analgesic<br>treatment | Change in<br>physiological<br>severity score |

### ***Risk of bias assessment***

Our assessments regarding each bias domain is provided in figure 2. Three of the six RCTs had a high risk of bias, with the main reasons being lack of random sequence generation, lack of allocation concealment or lack of blinding of patients, personnel and outcome assessors.

### ***Comparisons***

The included studies covered five comparisons involving ketamine (table 1):

- Ketamine i.v. vs. opioids (morphine<sup>26</sup>, fentanyl<sup>25</sup>, pentazocine<sup>19</sup>) i.v.
- Ketamine i.v. and morphine i.v. vs. only morphine i.v.<sup>20 23 24</sup>
- Ketamine i.v. given as continuous administration vs. ketamine i.v. as single dose<sup>22</sup>
- Ketamine intranasally and nitrous oxide vs. only nitrous oxide<sup>21</sup>
- Ketamine i.v. vs. no analgesia/no medication<sup>19</sup>

In table 1, we give a short description of the included studies and the doses used, while the excluded studies are presented with the reason for their exclusion in appendix 2. One study contributed to two comparisons<sup>19</sup>, meaning that 713 patients who received ketamine are compared twice, first with patients who received opioids and again with patients who did not receive analgesic treatment.

#### ***Ketamine vs. opioids***

A change in pain score was reported in two studies. Bronsky et al.<sup>25</sup> used the numeric pain rating scale (NRS), where 1 represents no pain and 10 represents extreme pain, while Tran et al.<sup>26</sup> measured the change in pain using the visual analogue scale (VAS) but did not explicitly give a range. Figure 3 shows that both studies reported a greater reduction in pain scores with ketamine than with the opioids fentanyl (MD -3.0 (95% CI -3.86 to 2.14)) and morphine (MD -0.4 (95% CI -0.08 to 0.0)).

The main outcome in the study by Losvik et al.<sup>19</sup> was the physiological severity score (PSS). The PSS was calculated from the blood pressure, respiratory rate and consciousness level<sup>27</sup>. They reported exactly the same change, at 1.5 (95% CI 1.4 to 1.6), in the PSS for both the ketamine and the pentazocine groups. Hence, no difference was found between the treatment groups.

1  
2  
3 Adverse events were reported in the Vietnamese study<sup>26</sup>; fewer patients with nausea and  
4 vomiting were found in the ketamine group than in the morphine group and fewer patients with  
5 agitation were found in the morphine group than in the ketamine group (figure 4).  
6  
7  
8  
9

10 In the study where ketamine and fentanyl were compared<sup>25</sup>, four adverse events were reported:  
11 two patients experienced respiratory compromise, and two patients suffered haemodynamic  
12 instability. All four patients were in the fentanyl group.  
13  
14  
15  
16

17 The change in Glasgow coma scale (GCS) was measured by Bronsky et al.<sup>25</sup> and found to be  
18 similar for ketamine and fentanyl, MD -0.13 (95% CI -0.33 to 0.07).  
19  
20  
21

### 22 *Ketamine and morphine vs. only morphine*

23 Changes in the pain scores were measured in both the Australian<sup>20</sup> and in the Swedish study<sup>24</sup>  
24 using a scale from 1 to 10 where 10 represented extreme pain. In the French study<sup>23</sup>, a scale  
25 from 0 to 100 was used, and we have transferred this to a 0 to 10 scale in order to include this  
26 study in the meta-analysis. Figure 5 shows the change in the pain score when prehospital  
27 patients received both ketamine and morphine compared with patients who received only  
28 morphine. Although the RCT performed by Jennings et al.<sup>20</sup> found lower pain scores in patients  
29 receiving combined ketamine and morphine than in patients receiving only morphine. When  
30 combined with the RCT by Galinski et al.<sup>23</sup>, the meta-analysis shows a non-significant  
31 reduction (MD -1.51 (95% CI -3.36 to 0.33)) in pain score. The small prospective cohort<sup>28</sup> also  
32 found a non-significant reduction (MD -1.30 (95% CI -2.95 to 0.35)) in pain score.  
33  
34  
35  
36  
37  
38  
39  
40  
41  
42

43 Adverse events were measured in both studies, and the results are illustrated in figure 6. It is  
44 important to note that the nausea and vomiting are included in the total adverse events in the  
45 RCTs. These results are characterized by few events but indicate that morphine alone may lead  
46 to fewer adverse events than the combination of ketamine and morphine.  
47  
48  
49  
50

51 The RCT by Jennings et al.<sup>20</sup> measured the GCS score and found that the median score was  
52 unchanged between initial assessment and the follow-up time, with a median score of 15 for  
53 both groups.  
54  
55  
56  
57  
58  
59  
60

1  
2  
3 The French RCT reported use of fewer boluses of morphine when combined with ketamine (1  
4 bolus (95% CI 0 to 2) compared with 2.3 boluses (95% CI 1.8 to 3.8) when using morphine  
5 alone)<sup>22</sup>.  
6  
7  
8  
9

10 The Swedish, prospective cohort by Johansson et al.<sup>28</sup> reported a non-significant trend for  
11 shorter treatment time with morphine alone than with ketamine and morphine combined (10  
12 min (95% CI -1.4 to 21.4). Ketamine was administered nasally thereby avoiding the need for  
13 i.v. access.  
14  
15  
16  
17

### 18 *Continuous ketamine administration vs. ketamine given as a bolus*

19 One multicentre RCT conducted in France compared the continuous administration of ketamine  
20 with a bolus dose of ketamine, but both groups also received morphine<sup>22</sup>. Changes in pain were  
21 measured using a VAS from 0 to 10 (worst). and were similar in both groups (VAS -0.6 (95%  
22 CI -1.84 to 0.64)).  
23  
24  
25  
26  
27  
28

29 The main outcome of this study was the amount of additional morphine used (mg/kg) (p=0.18),  
30 indicating that there was no difference between the continuous group, at 0.048 (1<sup>st</sup> quartile, 3<sup>rd</sup>  
31 quartile 0.000, 0.150), and the bolus group, at 0.107 (1<sup>st</sup> quartile, 3<sup>rd</sup> quartile 0.052, 0.150). The  
32 duration of care for both groups was 35 minutes. Nausea and vomiting were not reported in  
33 patients in the continuous group but were reported in three patients in the bolus group.  
34  
35  
36  
37  
38

### 39 *Ketamine and nitrous oxide vs. only nitrous oxide*

40 Andolfatto et al. used a verbal NRS pain score and evaluated the scores after 15 minutes and  
41 30 minutes<sup>21</sup>. More patients in the ketamine and nitrous oxide group had a reduction in pain of  
42 2 or more points than those in the saline and nitrous oxide group at both time points (figure 7).  
43  
44  
45  
46  
47

48 They reported no serious adverse effects in either group, but a considerable number of minor  
49 adverse events, such as feeling of unreality, dizziness, nausea, fatigue, general discomfort,  
50 mood change, hallucination, change in hearing and headache, occurred. Most of these side  
51 effects (52 of 66 events) were reported in the group of patients who received ketamine and  
52 nitrous oxide combined, as shown in figure 8.  
53  
54  
55  
56  
57

### 58 *Ketamine vs. no analgesic treatment*



1  
2  
3 The retrospectively matched observational study of patients/causalities in the war zone in Iraq  
4 compared the use of ketamine with no analgesic treatment<sup>19</sup>. The main outcome in this study  
5 was the PSS, which was calculated from the blood pressure, respiratory rate and consciousness  
6 level. There was a non-significant trend for lower PSS with ketamine compared with no  
7 analgesics (MD -0.2 (95% CI -0.42 to 0.02)).  
8  
9

### 13 *Adverse events from ketamine across the five comparisons*

15 Seven of the eight studies reported on adverse events and/or side effects from use of ketamine.  
16 Five studies reported on nausea and vomiting from ketamine alone (8/169)<sup>26</sup>, from ketamine  
17 continuous administration (0/30)<sup>22</sup>, from ketamine bolus administration (3/33)<sup>22</sup>, and from  
18 combined ketamine and morphine (8/33)<sup>23</sup>, (4/70)<sup>20</sup>, (7/16)<sup>24</sup>. Time for administering each  
19 bolus were not reported. Only one study reported on agitation, from ketamine alone (19/169)<sup>26</sup>.  
20 Four studies reported adverse events, and two stated that nausea and vomiting were included as  
21 adverse events, from ketamine and morphine (21/33)<sup>23</sup>, (27/70)<sup>20</sup>. One study reported adverse  
22 events from ketamine and nitrous oxide (52/60)<sup>21</sup>, and one study reported no adverse events  
23 from ketamine alone (0/79)<sup>25</sup>.  
24  
25  
26  
27  
28  
29  
30

### 32 **GRADE**

34 The quality of the main outcomes for the comparisons involving the use of ketamine for the  
35 treatment of prehospital acute pain, was assessed according to the GRADE method<sup>18</sup>. The  
36 quality of evidence could be downgraded for various reasons (risk of bias, inconsistency,  
37 indirectness, imprecision and publication bias). Consequently, the quality of the evidence was  
38 classified as high, moderate, low or very low. As described in table 2, we have for many of  
39 these outcomes downgraded for study limitations/high risk of bias, or for imprecision because  
40 there were few events in many of these studies.  
41  
42  
43  
44  
45  
46  
47  
48  
49  
50  
51  
52  
53  
54  
55  
56  
57  
58  
59  
60

Table 2. Summary of findings for the comparisons. \*The risk in the intervention group (and its 95% CI) assumed risk in the comparison group and the relative effect of the intervention (and its 95% CI). **GRADE Working Group grades of evidence: High certainty:** We are very confident that the true effect is similar to that of the estimated effect. **Moderate certainty:** We are moderately confident in the effect estimate; the true effect is likely to be close to the estimate of the effect, but there is a possibility that it is substantially different. **Low certainty:** Our confidence in the effect estimate is limited; the true effect may be substantially different from the estimated effect. **Very low certainty:** We have very little confidence in the effect estimate; the true effect is likely to be substantially different from the estimated effect.

**Ketamine compared to opioids for prehospital pain management**

**Patient or population:** Prehospital pain management

**Setting:** Prehospital setting in the USA and Vietnam

**Intervention:** Ketamine

**Comparison:** Opioids

| Outcomes                                                   | Anticipated absolute effects* (95% CI)    |                                                                                             | Relative effect (95% CI) | № of participants (studies) | Certainty of the evidence (GRADE) | Comments |
|------------------------------------------------------------|-------------------------------------------|---------------------------------------------------------------------------------------------|--------------------------|-----------------------------|-----------------------------------|----------|
|                                                            | Risk with opioids                         | Risk with ketamine                                                                          |                          |                             |                                   |          |
| Change in pain score assessed with VAS                     | The mean change in the pain score was 3.1 | The mean change in the pain score in the intervention group was 0.4 less (0.8 less to 0)    | -                        | 308 (1 RCT)                 | ⊕⊕⊕○<br>MODERATE <sup>a</sup>     |          |
| Change in pain score assessed with NRS scale from: 1 to 10 | The mean change in the pain score was 2.5 | The mean change in pain score in the intervention group was 3 less (3.86 less to 2.14 less) | -                        | 158 (1 observational study) | ⊕⊕○○<br>LOW                       |          |
| Serious adverse events                                     | 51 per 1,000                              | 0 per 1,000 (0 to 0)                                                                        | Not estimable            | 158 (1 observational study) | ⊕⊕○○<br>VERY LOW <sup>b</sup>     |          |
| Nausea and vomiting                                        | 194 per 1,000                             | 47 per 1,000 (21 to 101)                                                                    | RR 0.24 (0.11 to 0.52)   | 308 (1 RCT)                 | ⊕⊕⊕○<br>MODERATE <sup>a</sup>     |          |
| Agitation                                                  | 14 per 1,000                              | 112 per 1,000 (27 to 474)                                                                   | RR 7.81 (1.85 to 32.97)  | 308 (1 RCT)                 | ⊕⊕⊕○<br>MODERATE <sup>a</sup>     |          |

Explanations: a. Downgraded one level for high risk of bias, b: Downgraded one level for imprecision, only 4 events and all four of them in the same group. There were no events in the other group and therefore RR cannot be estimated

**Ketamine and morphine compared to only morphine for prehospital pain management**

**Patient or population:** Prehospital pain management

**Setting:** Prehospital setting in Sweden, France and Australia

**Intervention:** Ketamine and morphine

**Comparison:** Only morphine

| Outcomes                                  | Anticipated absolute effects* (95% CI) |                                             | Relative effect (95% CI) | № of participants (studies) | Certainty of the evidence (GRADE) | Comments |
|-------------------------------------------|----------------------------------------|---------------------------------------------|--------------------------|-----------------------------|-----------------------------------|----------|
|                                           | Risk with only morphine                | Risk with ketamine and morphine             |                          |                             |                                   |          |
| Change in pain scores Scale from: 1 to 10 | The mean change in pain scores was 3.5 | Mean 1.51 lower (3.36 lower to 0.33 higher) | -                        | 135 (2 RCTs)                | ⊕⊕○○<br>LOW <sup>ab</sup>         |          |

## Ketamine and morphine compared to only morphine for prehospital pain management

**Patient or population:** Prehospital pain management

**Setting:** Prehospital setting in Sweden, France and Australia

**Intervention:** Ketamine and morphine

**Comparison:** Only morphine

| Outcomes                                           | Anticipated absolute effects*<br>(95% CI)   |                                                  | Relative effect<br>(95% CI) | No of<br>participants<br>(studies)  | Certainty of the<br>evidence<br>(GRADE) | Comments                                                     |
|----------------------------------------------------|---------------------------------------------|--------------------------------------------------|-----------------------------|-------------------------------------|-----------------------------------------|--------------------------------------------------------------|
|                                                    | Risk with<br>only<br>morphine               | Risk with<br>ketamine and<br>morphine            |                             |                                     |                                         |                                                              |
| Change in pain<br>scores<br>Scale from: 1 to<br>10 | The mean<br>change in pain<br>score was 3.1 | Mean 1.3 lower<br>(2.95 lower to<br>0.35 higher) | -                           | 27<br>(1<br>observational<br>study) | ⊕○○○<br>VERY LOW <sup>a</sup>           |                                                              |
| Serious<br>adverse events                          | Not reported                                | Not estimable                                    | -                           | -                                   | -                                       | None of the 2 studies reported any<br>serious adverse events |
| Total number of<br>adverse events                  | 165 per 1 000                               | 468 per<br>1 000<br>(289 to 764)                 | RR 2.84<br>(1.75 to 4.63)   | 200<br>(2 RCTs)                     | ⊕⊕⊕○<br>MODERATE <sup>b</sup>           |                                                              |

Explanations: a. Downgraded one level for imprecision, this cohort only has 27 patients included b. Downgraded one level for risk of bias due to unclear randomization and open label design

## Continuous administration of ketamine compared to ketamine given as a bolus for prehospital pain management

**Patient or population:** Prehospital pain management

**Setting:** Prehospital setting in France

**Intervention:** Continuous administration of ketamine

**Comparison:** Ketamine given as a bolus

| Outcomes                                        | Anticipated absolute effects*<br>(95% CI)          |                                                                                                                 | Relative effect<br>(95% CI) | No of<br>participants<br>(studies) | Certainty of the<br>evidence<br>(GRADE) | Comments                           |
|-------------------------------------------------|----------------------------------------------------|-----------------------------------------------------------------------------------------------------------------|-----------------------------|------------------------------------|-----------------------------------------|------------------------------------|
|                                                 | Risk with<br>ketamine<br>given as a<br>bolus       | Risk with the<br>continuous<br>administration<br>of ketamine                                                    |                             |                                    |                                         |                                    |
| Change in pain<br>scores.<br>Scale from 0 to 10 | The mean<br>change in the<br>pain score was<br>3.1 | The mean<br>change in pain<br>score in the<br>intervention<br>group was 0.6<br>less (1.84 less<br>to 0.64 more) | -                           | 63<br>(1 RCT)                      | ⊕⊕○○<br>LOW <sup>a</sup>                |                                    |
| Serious adverse<br>events                       | -                                                  | -                                                                                                               | not estimable               | (1 study)                          | -                                       | No serious events were<br>reported |
| Nausea and<br>vomiting                          | 91 per 1,000                                       | 0 per 1,000<br>(0 to 0)                                                                                         | not estimable               | 63<br>(1 RCT)                      | ⊕⊕○○<br>VERY LOW <sup>a, b</sup>        |                                    |

Explanations: a. Downgraded one level for imprecision, one study included with 63 patients, b. Downgraded one level for imprecision, only 3 events

**Ketamine and nitrous oxide compared to only nitrous oxide for prehospital pain management**

**Patient or population:** Prehospital pain management

**Setting:** Prehospital setting in Canada

**Intervention:** Ketamine and nitrous oxide

**Comparison:** Only nitrous oxide

| Outcomes                               | Anticipated absolute effects* (95% CI) |                                      | Relative effect (95% CI) | No of participants (studies) | Certainty of the evidence (GRADE) | Comments |
|----------------------------------------|----------------------------------------|--------------------------------------|--------------------------|------------------------------|-----------------------------------|----------|
|                                        | Risk with only nitrous oxide           | Risk with ketamine and nitrous oxide |                          |                              |                                   |          |
| ≥2 point reduction in pain, 15 minutes | 350 per 1 000                          | 634 per 1 000 (427 to 931)           | RR 1.81 (1.22 to 2.66)   | 120 (1 RCT)                  | ⊕⊕⊕○<br>MODERATE <sub>a</sub>     |          |
| ≥2 point reduction in pain, 30 minutes | 407 per 1 000                          | 758 per 1 000 (534 to 1 000)         | RR 1.86 (1.31 to 2.66)   | 108 (1 RCT)                  | ⊕⊕⊕○<br>MODERATE <sub>a</sub>     |          |
| Serious adverse events                 | 0 per 1 000                            | 0 per 1 000 (0 to 0)                 | Not estimable            | (1 RCT)                      | -                                 |          |
| Total number of adverse events         | 233 per 1 000                          | 866 per 1 000 (541 to 1 000)         | RR 3.71 (2.32 to 5.31)   | 120 (1 RCT)                  | ⊕⊕⊕○<br>MODERATE <sub>a</sub>     |          |
| Number of patients with adverse events | 200 per 1 000                          | 616 per 1 000 (358 to 1 000)         | RR 3.08 (1.79 to 5.31)   | 120 (1 RCT)                  | ⊕⊕⊕○<br>MODERATE <sub>a</sub>     |          |

Explanations: a. Downgraded one level for imprecision, only one study with a total of 120 patients. There are also large effects, but with unclear blinding we do not upgrade

## Discussion

In this systematic review addressing the effect and safety of prehospital administration of ketamine in analgesic doses, we included eight studies with 2,760 patients in total.

### *Strengths and limitations of this systematic review*

The included studies were heterogeneous in terms of setting, patient population and outcomes explored, as well as in their comparators, such as i.v. or intranasal ketamine with a variety of opioids or with nitrous oxide. In addition, a single dose of ketamine was compared with ketamine which was administered continuously.

Although the evidence base includes five RCTs, five of the eight included studies have a high risk of bias. The RCTs were relatively small studies with 63, 65, 120, 135 and 308 patients included, respectively. None of the studies were designed or powered to truly test the safety of ketamine. Adverse events and the severity thereof were inconsistently reported.

The eight studies cover five different comparisons, so the amount of research evidence for each comparison is sparse. Only one of the outcomes in one of the comparisons has been measured in more than one study of similar design, and several of the outcomes has not been assessed in a prehospital study at all. When using GRADE to assess our confidence in the estimates, we more often than not, downgraded for high risk of bias or imprecision due to very few events or wide confidence intervals. Three of the eight included studies are observational studies. They have an initial high risk of bias compared to RCTs due to the lack of randomization. This is acknowledged in GRADE where observational studies start at low quality of evidence. Lack of blinding is a weakness in all of these studies. This becomes a challenge when the main outcome is subjective, pain, and we have downgraded for high risk of bias. However, there is moderate quality of the evidence for the main outcome, change in pain score, for one of the comparisons.

This systematic review has the benefit of systematic and transparent pre-planned methodology (PROSPERO registration number CRD42018114399): Decisions and judgements were conducted by two authors independently of each other, hence, reducing the risk of bias in the conduct of the review. We conducted a wide literature search in several databases, but it is still possible that there exist relevant studies that we did not identify, both in other databases and in other languages. As always with systematic reviews, there is the possibility that relevant studies may have been published after our search was conducted. Our deviation from the protocol to

1  
2  
3 include a large study even though it included some children may be interpreted as a limitation.  
4 However, we would argue that the inclusion of extra patients (1876 patients added to the 884  
5 patients from the other seven studies) where the large majority were adults adds greatly to the  
6 available information regarding side effects/adverse events.  
7  
8  
9

10  
11 Two of the studies were conducted in Iraq and in Vietnam, respectively, where a number of  
12 patients were injured in mine accidents. These studies were the largest studies and included  
13 1,909 patients. It is reasonable to assume that the results from studies conducted in war zones  
14 are not directly applicable in civilian settings since the victims tend to be male, relatively young  
15 and previously healthy and are not representative of trauma victims in general. The study from  
16 Iraq did not report on any of our predefined outcomes.  
17  
18  
19  
20  
21  
22

### 23 *Clinical implications*

24 Ketamine administered in analgesic doses (0.1-0.2 mg/kg) i.v. appears to be at least as effective  
25 as opioids administered alone considering pain reduction. In the study from Iraq, an initial dose  
26 of ketamine (0.2 mg/kg) was given in all cases of penetrating trauma and burns, but patients  
27 with TBI or blunt injury received only pentazocine<sup>19</sup>. The patients in the study conducted by  
28 Tran et al. received 0.2-0.3 mg/kg i.v. of ketamine<sup>26</sup>. Four<sup>22-25</sup> of the other five studies included  
29 studies administered ketamine in 0.2-0.3 mg/kg i.v. doses, while in the last i.v. study<sup>20</sup>, the  
30 patients received 10-20 mg i.v. of ketamine. In the study where ketamine was administered  
31 intranasally, the patients received an average of 0.75 mg/kg of ketamine<sup>21</sup>. Hence, the patients  
32 in all studies received appropriate analgesic doses of ketamine.  
33  
34  
35  
36  
37  
38  
39  
40  
41  
42

### 43 *Adverse events*

44 In general, very few adverse events were reported in the included studies. Most of the events  
45 were related to nausea and vomiting. Agitation was more common in the ketamine group in the  
46 study performed by Tran et al.<sup>26</sup> Bronsky et al. reported that two patients experienced  
47 respiratory compromise and two suffered haemodynamic instability<sup>25</sup>. All four patients were in  
48 the fentanyl group.  
49  
50  
51  
52  
53

54 Given the safety profile of ketamine and the results reported in the included studies, it appears  
55 reasonable to suggest that low-dose ketamine for analgesic purposes can be administered safely  
56 during prehospital emergency care when proper indications and contraindications are  
57 identified. Prehospital healthcare providers with a level of training suitable to administer  
58  
59  
60

1  
2  
3 ketamine – that is personnel that are trained to handle potential adverse events – must be  
4 identified. None of the included studies had enough power to detect differences in rare events,  
5 and the quality of evidence was poor. One of the studies showed an increased number (pooled)  
6 of adverse events in the group receiving ketamine and morphine, indicating that an improved  
7 analgesic effect increases the risk for adverse events. It is unclear whether adverse events are  
8 more likely to occur with opioids than with ketamine. However, it is essential to note that this  
9 review describes ketamine administered in analgesic doses and not in sedative and anaesthetic  
10 doses where advanced skills are required to be able to handle the patient in an adequate manner.  
11  
12  
13  
14  
15  
16  
17

### 18 *Studies from other settings*

19  
20 In a recent systematic review and meta-analysis Yousefifard et al. included seven studies and  
21 pooled the effect estimates of observational and randomised interventional studies<sup>29</sup>. They  
22 concluded that ketamine is an effective and safe medication in prehospital pain management in  
23 trauma patients and can be considered as an acceptable alternative to opioids. The analgesic  
24 effect of low-dose ketamine is also employed in the hospital. In a recent systematic review and  
25 meta-analysis, Karlow et al. studied ketamine as an alternative to opioids for acute pain in the  
26 emergency department (ED)<sup>30</sup>. The authors concluded that ketamine can be used as an  
27 alternative to opioids in the ED, as they found that ketamine was noninferior to opioids. They  
28 also found that the rate of non-severe adverse effects was higher with ketamine. It is unclear to  
29 what extent results from ED studies can be extrapolated to the prehospital setting. However, it  
30 is not obvious that the safety profile of ketamine in the prehospital setting is independent of the  
31 qualifications of the health care provider that administers the drug. Studies specifically  
32 addressing competence of prehospital providers administering ketamine should therefore be  
33 conducted. The body of evidence for benefit and possible harm is limited as few studies have  
34 been performed. Future studies need to address all relevant side effects, the optimal drug dose  
35 as well as all relevant outcome measures.  
36  
37  
38  
39  
40  
41  
42  
43  
44  
45  
46  
47  
48  
49

### 50 **Conclusion:**

51 This systematic review of the current literature indicates that ketamine is an effective analgesic  
52 to be administered prehospitally.  
53  
54  
55

### 56 **Acknowledgements**

57 We thank research librarian Jane Kjemtrup Andersen (Viborg Regional Hospital, Denmark) for  
58 developing the search strategies.  
59  
60

**Authors contributions:**

MS supervised the process of drafting this manuscript and coordinated all identification, data extraction and appraisal of included manuscripts. MS and either PKH, MR or PK independently assessed all potential eligible articles for inclusion. GEV coordinated all methodological support. MS, PKH, PK, KDF, LR, RL, VM, LR, JK, MR, GEV are members of the SSAI task force on pre-hospital pain management and participated in planning, design, interpretation of results, manuscript drafting and revisions of the manuscript.

**Competing interest:**

The authors declare no conflicts of interest

**Funding:**

SSAI funded meetings and software costs. The Norwegian Air Ambulance Foundation funded publication costs. Otherwise this research received no further grant from any funding agency in the public, commercial or not-for-profit sectors.

**Data sharing statement:**

No additional data available

**Figure legends:**

**Figure 1:** Flow diagram of evaluated records

**Figure 2:** Risk of bias

**Figure 3:** Ketamine versus opioids - change in pain score

**Figure 4:** Ketamine versus opioids - adverse events

**Figure 5:** Combined ketamine and morphine compared with only morphine - change in pain score

**Figure 6:** Combined ketamine and morphine compared with only morphine - adverse events

**Figure 7:** Ketamine and N2O vs only N2O - change in pain score

**Figure 8:** Ketamine and N2O vs only N2O - adverse events



## References

1. Jennings PA, Cameron P, Bernard S. Epidemiology of prehospital pain: an opportunity for improvement. *Emerg Med J* 2011;28(6):530-1.
2. Albrecht E, Taffe P, Yersin B, et al. Undertreatment of acute pain (oligoanalgesia) and medical practice variation in prehospital analgesia of adult trauma patients: a 10 yr retrospective study. *Br J Anaesth* 2013;110(1):96-106.
3. Galinski M, Ruscev M, Gonzalez G, et al. Prevalence and management of acute pain in prehospital emergency medicine. *Prehosp Emerg Care* 2010;14(3):334-9.
4. Bounes V, Barniol C, Minville V, et al. Predictors of pain relief and adverse events in patients receiving opioids in a prehospital setting. *Am J Emerg Med* 2011;29(5):512-7.
5. Lodge D, Anis NA, Burton NR. Effects of optical isomers of ketamine on excitation of cat and rat spinal neurones by amino acids and acetylcholine. *Neurosci Lett* 1982;29(3):281-6.
6. Craven R. Ketamine. *Anaesthesia* 2007;62 Suppl 1:48-53.
7. Green SM, Johnson NE. Ketamine sedation for pediatric procedures: Part 2, Review and implications. *Ann Emerg Med* 1990;19(9):1033-46.
8. Bourgoin A, Albanese J, Leone M, et al. Effects of sufentanil or ketamine administered in target-controlled infusion on the cerebral hemodynamics of severely brain-injured patients. *Crit Care Med* 2005;33(5):1109-13.
9. Bourgoin A, Albanese J, Wereszczynski N, et al. Safety of sedation with ketamine in severe head injury patients: comparison with sufentanil. *Crit Care Med* 2003;31(3):711-7.
10. Albanese J, Arnaud S, Rey M, et al. Ketamine decreases intracranial pressure and electroencephalographic activity in traumatic brain injury patients during propofol sedation. *Anesthesiology* 1997;87(6):1328-34.
11. Bar-Joseph G, Guilburd Y, Tamir A, et al. Effectiveness of ketamine in decreasing intracranial pressure in children with intracranial hypertension. *J Neurosurg Pediatr* 2009;4(1):40-6.
12. Sherwin TS, Green SM, Khan A, et al. Does adjunctive midazolam reduce recovery agitation after ketamine sedation for pediatric procedures? A randomized, double-blind, placebo-controlled trial. *Ann Emerg Med* 2000;35(3):229-38.
13. McManus JG, Jr., Sallee DR, Jr. Pain management in the prehospital environment. *Emerg Med Clin North Am* 2005;23(2):415-31.
14. Kennedy RM, Porter FL, Miller JP, et al. Comparison of fentanyl/midazolam with ketamine/midazolam for pediatric orthopedic emergencies. *Pediatrics* 1998;102(4):956-63.
15. McGuinness SK, Wasiak J, Cleland H, et al. A systematic review of ketamine as an analgesic agent in adult burn injuries. *Pain Med* 2011;12(10):1551-8.
16. Bonanno FG. Ketamine in war/tropical surgery (a final tribute to the racemic mixture). *Injury* 2002;33(4):323-7.
17. Higgins JPT, Green S. *Cochrane handbook for systematic reviews of interventions*. The Cochrane Collaboration. 2011.
18. Atkins D, Best D, Briss PA, et al. Grading quality of evidence and strength of recommendations. *BMJ* 2004;328(7454):1490-7.
19. Losvik OK, Murad MK, Skjerve E, et al. Ketamine for prehospital trauma analgesia in a low-resource rural trauma system: a retrospective comparative study of ketamine and opioid analgesia in a ten-year cohort in Iraq. *Scand J Trauma Resusc Emerg Med* 2015;23:94.

- 1
  - 2
  - 3
  - 4
  - 5
  - 6
  - 7
  - 8
  - 9
  - 10
  - 11
  - 12
  - 13
  - 14
  - 15
  - 16
  - 17
  - 18
  - 19
  - 20
  - 21
  - 22
  - 23
  - 24
  - 25
  - 26
  - 27
  - 28
  - 29
  - 30
  - 31
  - 32
  - 33
  - 34
  - 35
  - 36
  - 37
  - 38
  - 39
  - 40
  - 41
  - 42
  - 43
  - 44
  - 45
  - 46
  - 47
  - 48
  - 49
  - 50
  - 51
  - 52
  - 53
  - 54
  - 55
  - 56
  - 57
  - 58
  - 59
  - 60
20. Jennings PA, Cameron P, Bernard S, et al. Morphine and ketamine is superior to morphine alone for out-of-hospital trauma analgesia: a randomized controlled trial. *Ann Emerg Med* 2012;59(6):497-503.
21. Andolfatto G, Innes K, Dick W, et al. Prehospital analgesia with intranasal ketamine (PAIN-K): a randomized double-blind trial in adults. *Ann Emerg Med* 2019;74:241-50
22. Wiel E, Zitouni D, Assez N, et al. Continuous infusion of ketamine for out-of-hospital isolated orthopedic injuries secondary to trauma: a randomized controlled trial. *Prehosp Emerg Care* 2015;19(1):10-16.
23. Galinski M, Dolveck F, Combes X, et al. Management of severe acute pain in emergency settings: ketamine reduces morphine consumption. *Am J Emerg Med* 2007;25(4):385-90.
24. Johansson P, Kongstad P, Johansson A. The effect of combined treatment with morphine sulphate and low-dose ketamine in a prehospital setting. *Scand J Trauma Resusc Emerg Med* 2009;17:61.
25. Bronsky ES, Koola C, Orlando A, et al. Intravenous low-dose ketamine provides greater pain control compared to fentanyl in a civilian prehospital trauma system: a propensity matched analysis. *Prehosp Emerg Care* 2018:1-8.
26. Tran KP, Nguyen Q, Truong XN, et al. A comparison of ketamine and morphine analgesia in prehospital trauma care: a cluster randomized clinical trial in rural Quang Tri province, Vietnam. *Prehosp Emerg Care* 2014;18(2):257-64.
27. Champion HR, Sacco WJ, Copes WS, et al. A revision of the Trauma Score. *J Trauma* 1989;29(5):623-9.
28. Johansson J, Sjoberg J, Nordgren M, et al. Prehospital analgesia using nasal administration of S-ketamine--a case series. *Scand J Trauma Resusc Emerg Med* 2013;21:38.
29. Yousefifard M, Askarian-Amiri S, Rafiei Alavi SN, et al. The efficacy of ketamine administration in prehospital pain management of trauma patients; a systematic review and meta-analysis. *Arch Acad Emerg Med* 2020;8(1):e1.
30. Karlow N, Schlaepfer CH, Stoll CRT, et al. A systematic review and meta-analysis of ketamine as an alternative to opioids for acute pain in the emergency department. *Acad Emerg Med* 2018;25(10):1086-97.

1  
2  
3  
4  
5  
6  
7  
8  
9  
10  
11  
12  
13  
14  
15  
16  
17  
18  
19  
20  
21  
22  
23  
24  
25  
26  
27  
28  
29  
30  
31  
32  
33  
34  
35  
36  
37  
38  
39  
40  
41  
42  
43  
44  
45  
46  
47  
48  
49  
50  
51  
52  
53  
54  
55  
56  
57  
58  
59  
60

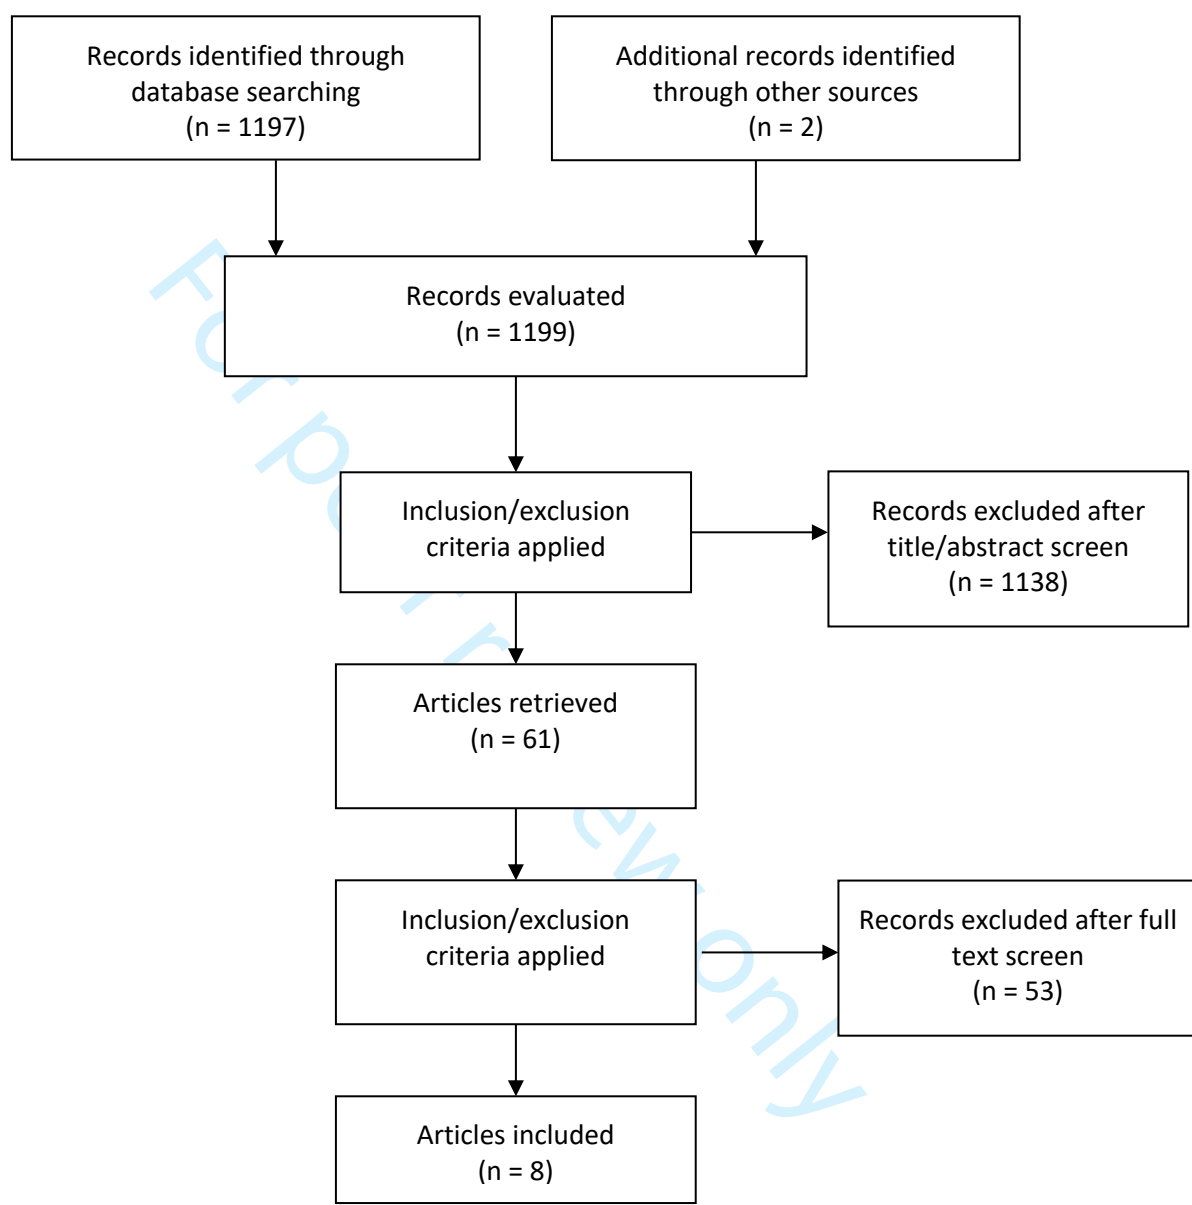

1  
2  
3  
4  
5  
6  
7  
8  
9  
10  
11  
12  
13  
14  
15  
16  
17  
18  
19  
20  
21  
22  
23  
24  
25  
26  
27  
28  
29  
30  
31  
32  
33  
34  
35  
36  
37  
38  
39  
40  
41  
42  
43  
44  
45  
46  
47  
48  
49  
50  
51  
52  
53  
54  
55  
56  
57  
58  
59  
60

Random sequence generation (selection bias)  
Allocation concealment (selection bias)  
Blinding of participants and personnel (performance bias)  
Blinding of outcome assessment (detection bias)  
Incomplete outcome data (attrition bias)  
Selective reporting (reporting bias)  
Other bias  
Baseline similarities

|                 | Randomized controlled trials |    |   |   |   |   |   |   |
|-----------------|------------------------------|----|---|---|---|---|---|---|
| Andolfatto 2019 | +                            | +  | + |   | + | + | + | + |
| Galinski 2007   | +                            | +  |   |   | + | + |   | + |
| Jennings 2012   |                              | +  | - | - | + | + | + | + |
| Tran 2014       | -                            | -  | - | - | + | + | + | + |
| Wiel 2014       | +                            | +  | + | - | + |   | + | + |
|                 | Cohorts                      |    |   |   |   |   |   |   |
| Bronsky 2018    | NA                           | NA | + | - | + | + | + | + |
| Johansson 2009  | NA                           | NA | - | - | + | + | + | + |
| Losvik 2015     | NA                           | NA | + | - | + |   | + | - |

1  
2  
3  
4  
5  
6  
7  
8  
9  
10  
11  
12  
13  
14  
15  
16  
17  
18  
19  
20  
21  
22  
23  
24  
25  
26  
27  
28  
29  
30  
31  
32  
33  
34  
35  
36  
37  
38  
39  
40  
41  
42  
43  
44  
45  
46  
47  
48  
49  
50  
51  
52  
53  
54  
55  
56  
57  
58  
59  
60

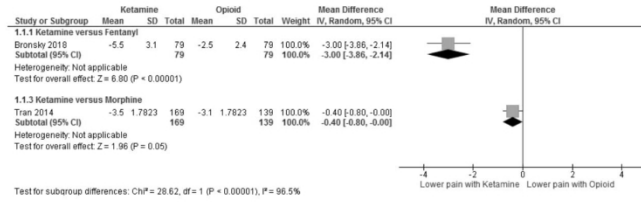

Fig. 3 - Ketamine versus opioids - change in pain score

583x825mm (72 x 72 DPI)

1  
2  
3  
4  
5  
6  
7  
8  
9  
10  
11  
12  
13  
14  
15  
16  
17  
18  
19  
20  
21  
22  
23  
24  
25  
26  
27  
28  
29  
30  
31  
32  
33  
34  
35  
36  
37  
38  
39  
40  
41  
42  
43  
44  
45  
46  
47  
48  
49  
50  
51  
52  
53  
54  
55  
56  
57  
58  
59  
60

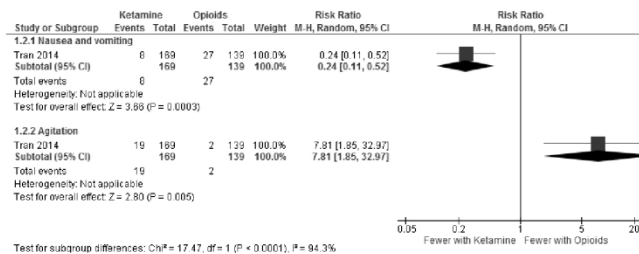

Fig. 4 - Ketamine versus opioids - adverse events

209x297mm (200 x 200 DPI)

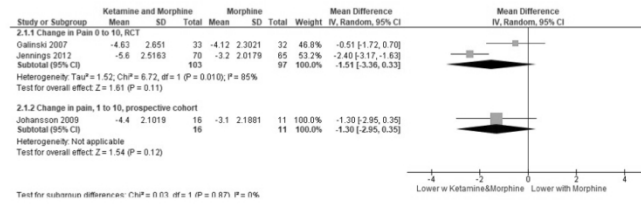

Fig. 5 - Combined ketamine and morphine compared with only morphine - change in pain score

209x296mm (150 x 150 DPI)

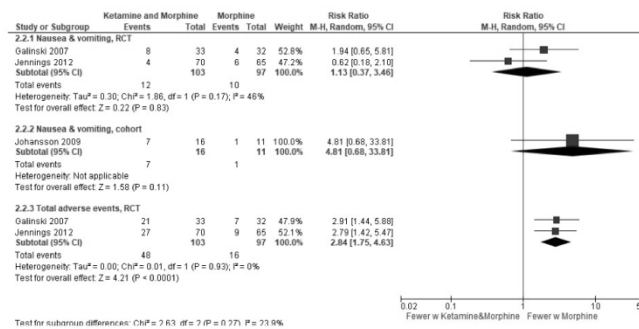

Fig. 6 - Combined ketamine and morphine compared with only morphine - adverse events

209x296mm (150 x 150 DPI)



1  
2  
3  
4  
5  
6  
7  
8  
9  
10  
11  
12  
13  
14  
15  
16  
17  
18  
19  
20  
21  
22  
23  
24  
25  
26  
27  
28  
29  
30  
31  
32  
33  
34  
35  
36  
37  
38  
39  
40  
41  
42  
43  
44  
45  
46  
47  
48  
49  
50  
51  
52  
53  
54  
55  
56  
57  
58  
59  
60

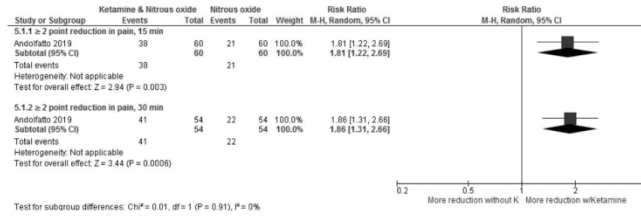

Fig. 7 - Ketamine and N2O vs only N2O - change in pain score

583x825mm (72 x 72 DPI)

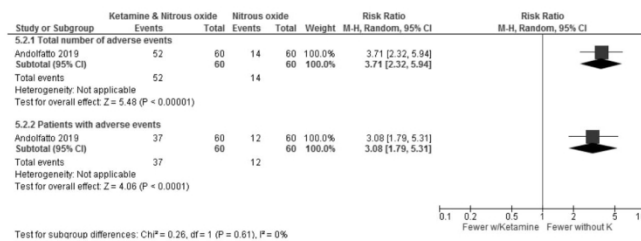

Fig. 8 - Ketamine and N2O vs only N2O - adverse events

583x825mm (72 x 72 DPI)

## SEARCH STRATEGIES

### PUBMED

- #1,"Search ketamine[Text Word]"
- #2,"Search analgesics, ketamine[Pharmacological Action]"
- #3,"Search ketamine[MeSH Terms]"
- #4,"Search (#1 OR #2 OR #3)"
- #5,"Search emergency medical services[MeSH Terms]"
- #6,"Search Ambulances[MeSH Terms]"
- #7,"Search Ambulance\*[Text Word]"
- #8,"Search Prehospital[Text Word]"
- #9,"Search Pre-hospital[Text Word]"
- #10,"Search out of hospital[Text Word]"
- #11,"Search Paramed\*[Text Word]"
- #12,"Search emergency medical technicians[MeSH Terms]"
- #13,"Search (#5 OR #6 OR #7 OR #8 OR #9 OR #10 OR #11 OR #12)"
- #14,"Search Danish[Language]"
- #15,"Search Norwegian[Language]"
- #16,"Search Swedish[Language]"
- #17,"Search English[Language]"
- #18,"Search (#14 OR #15 OR #16 OR #17)"
- #19,"Search (#4 AND #13 AND #18)"
- #20,"Search Animals[MeSH Terms]"
- #21,"Search Humans[MeSH Terms]"
- #22,"Search (#20 NOT #21)"
- #23,"Search (#19 NOT #22)"
- #24,"Search (""xxxx/xx/xx""[Date - Entrez]: ""xxxx/xx/xx""[Date - Entrez])"
- #25,"Search (#23 AND #24)"

### EMBASE

- #1, analgesic agent/
- #2, ketamine.m.\_titl.
- #3, rescue personnel/
- #4, ambulance/
- #5, emergency health service/
- #6, "emergency medical technician\*".ab.ti.
- #7, "emergency responder\*".ab.ti.
- #8, rescue service. ab.ti.
- #9, "Paramed\*". ab.ti.
- #10, "ambulance\*". ab.ti.
- #11, pre-hospital. ab.ti.
- #12, prehospital. ab.ti.
- #13, out-of-hospital. ab.ti.
- #14, or/3-13
- #15, or/1-2
- #16, and/14-15

## Cochrane Library

- #1 MeSH descriptor: [Ketamine] explode all trees  
#2 MeSH descriptor: [Emergency Medical Technicians] explode all trees  
#3 MeSH descriptor: [Ambulances] explode all trees  
#4 paramed\*  
#5 out-of-hospital  
#6, pre-hospital  
#7, prehospital  
#8, ambulance\*  
#9, #2 OR #3 OR #4 OR #5 OR #6 OR #7 OR #8  
#10, #1 AND # 9

## Epistemonikos

(title:(title:(prehospital OR pre-hospital OR out-of-hospital OR ambulance\* OR “emergency medical technicians” OR “emergency medical service\*”) OR abstract:(prehospital OR pre-hospital OR out-of-hospital OR ambulance\* OR “emergency medical technicians” OR “emergency medical service\*”)) AND (title:(ketamin\*) OR abstract:(ketamin\*)))

## Appendix 2

| Excluded reference                                                                                                                                                                                                                                                   | Reason for exclusion                          |
|----------------------------------------------------------------------------------------------------------------------------------------------------------------------------------------------------------------------------------------------------------------------|-----------------------------------------------|
| Allison K, Porter K. Consensus on the pre-hospital approach to burns patient management. <i>Injury</i> 2004; 35: 734-8.                                                                                                                                              | Ketamine not central in the text              |
| Anonymous. Comments on the recommendations of the German Medical Society dated October 20, 2003 on the administration of analgesics by paramedics in emergency situations. <i>Notarzt</i> 2005; 21: 81-82.                                                           | Excluded due to language restrictions         |
| Ansem RP, Hartman JA, Foudraine JF, van Loenen E, Rutten FL. [Analgetic ketamine feasible in ambulance emergency care]. <i>Ned Tijdschr Geneesk</i> 1994; 138: 2301-4.                                                                                               | Excluded due to language restrictions         |
| Ardeel E. Adverse effects following prehospital use of ketamine by paramedics. <i>Acad Emerg Med</i> 2012; 19: S269-S70.                                                                                                                                             | Letter                                        |
| Aries P, Montelescaut E, Pessey F, Danguy des Deserts M, Giacardi C. Pre-hospital emergency medicine: pain control. <i>Lancet</i> 2016; 387: 747.                                                                                                                    | Ketamine not central in the text              |
| Arroyo-Novoa CM, Figueroa-Ramos MI, Miaskowski C, Padilla G, Paul SM, Rodriguez-Ortiz P, Stotts NA, Puntillo KA. Efficacy of small doses of ketamine with morphine to decrease procedural pain responses during open wound care. <i>Clin J Pain</i> 2011; 27: 561-6. | Patient population did not match the criteria |
| Barrett TW, Schriger DL. Move over morphine: Is ketamine an effective and safe alternative for treating acute pain? Answers to the September 2015 journal club. <i>Ann Emerg Med</i> 2016; 67: 289-94.                                                               | Setting did not match the criteria            |
| Berg C. Out-of-hospital ketamine for pain, agitation, and airway intervention is safe and effective. <i>Ann Emerg Med</i> 2015; 66: S32.                                                                                                                             | Study design did not match the criteria       |
| Bredmose PP, Grier G, Davies GE, Lockey DJ. Pre-hospital use of ketamine in paediatric trauma. <i>Acta Anaesthesiol Scand</i> 2009; 53: 543-5.                                                                                                                       | Patient population did not match the criteria |

|                                                    |                                                                                                                                                                                                                                                                                             |                                               |
|----------------------------------------------------|---------------------------------------------------------------------------------------------------------------------------------------------------------------------------------------------------------------------------------------------------------------------------------------------|-----------------------------------------------|
| 1<br>2<br>3<br>4<br>5<br>6<br>7<br>8               | Bredmose PP, Lockey DJ, Grier G, Watts B, Davies G. Pre-hospital use of ketamine for analgesia and procedural sedation. EMJ 2009; 26: 62-4.                                                                                                                                                 | Study design did not match the criteria       |
| 9<br>10<br>11<br>12<br>13<br>14<br>15<br>16        | Brokmann JC, Rossaint R, Hirsch F, Beckers SK, Czaplík M, Chowanetz M, Tamm M, Bergrath S. Analgesia by telemedically supported paramedics compared with physician-administered analgesia: A prospective, interventional, multicentre trial. Eur J Pain 2016; 20: 1176-84.                  | Ketamine not central in the text              |
| 17<br>18<br>19<br>20<br>21<br>22<br>23<br>24<br>25 | Butler FK, Kotwal RS, Buckenmaier CC, 3rd, Edgar EP, O'Connor KC, Montgomery HR, Shackelford SA, Gandy JV, 3rd, Wedmore IS, Timby JW, Gross KR, Bailey JA. A triple-option analgesia plan for tactical combat casualty care: TCCC guidelines change 13-04. J Spec Oper Med 2014; 14: 13-25. | Study design did not match the criteria       |
| 26<br>27<br>28                                     | Castle N, Naidoo R. Achieving prehospital analgesia. EMJ 2012; 29: 765-6.                                                                                                                                                                                                                   | Setting did not match the criteria            |
| 29<br>30<br>31<br>32<br>33                         | Castren M, Lindstrom V, Branzell JH, Niemi-Murola L. Prehospital personnel's attitudes to pain management. Scand J Pain 2015; 8: 17-22.                                                                                                                                                     | Study design did not match the criteria       |
| 34<br>35<br>36<br>37<br>38                         | Chesters A, Webb T. Ketamine for procedural sedation by a doctor-paramedic prehospital care team: a 4-year description of practice. Eur J Emerg Med 2015; 22: 401-6.                                                                                                                        | Patient population did not match the criteria |
| 39<br>40<br>41<br>42<br>43<br>44<br>45             | Corrigan M, Wilson SS, Hampton J. Safety and efficacy of intranasally administered medications in the emergency department and prehospital settings. Am J Health Syst Pharm 2015; 72: 1544-54.                                                                                              | Study design did not match the criteria       |
| 46<br>47<br>48<br>49<br>50<br>51                   | Domonoske B, Gunter R, Love J. Ketamine may increase the risk of PE in selected trauma patients. Crit Care Med 2014; 42: A1610.                                                                                                                                                             | Setting did not match the criteria            |
| 52<br>53<br>54                                     | Domonoske B, Love J. Ketamine reduces the incidence of VTE in selected trauma patients. Crit Care Med 2013; 41: A55.                                                                                                                                                                        | Setting did not match the criteria            |
| 55<br>56<br>57<br>58<br>59<br>60                   | Eidenbenz D, Taffe P, Hugli O, Albrecht E, Pasquier M. A two-year retrospective review of the determinants of pre-hospital analgesia administration by alpine helicopter                                                                                                                    | Study design did not match the criteria       |

|                                                                                                                                                                                                                                                                                                                                                             |                                                                                                                                                                                                                                                                                                                                                                                                                                                                                                                                                                                                                                                                                                                                                                                                                                                                                                                                                                                                                                                                                                                                                                                                                                                                                                                                                                                                                                                                                                                                                                                                                                                                                                                                                                                                                                                                                                                                                                  |                                                                                                                                                                                                                                                                                                                                   |
|-------------------------------------------------------------------------------------------------------------------------------------------------------------------------------------------------------------------------------------------------------------------------------------------------------------------------------------------------------------|------------------------------------------------------------------------------------------------------------------------------------------------------------------------------------------------------------------------------------------------------------------------------------------------------------------------------------------------------------------------------------------------------------------------------------------------------------------------------------------------------------------------------------------------------------------------------------------------------------------------------------------------------------------------------------------------------------------------------------------------------------------------------------------------------------------------------------------------------------------------------------------------------------------------------------------------------------------------------------------------------------------------------------------------------------------------------------------------------------------------------------------------------------------------------------------------------------------------------------------------------------------------------------------------------------------------------------------------------------------------------------------------------------------------------------------------------------------------------------------------------------------------------------------------------------------------------------------------------------------------------------------------------------------------------------------------------------------------------------------------------------------------------------------------------------------------------------------------------------------------------------------------------------------------------------------------------------------|-----------------------------------------------------------------------------------------------------------------------------------------------------------------------------------------------------------------------------------------------------------------------------------------------------------------------------------|
| 1<br>2<br>3<br>4<br>5<br>6<br>7<br>8<br>9<br>10<br>11<br>12<br>13<br>14<br>15<br>16<br>17<br>18<br>19<br>20<br>21<br>22<br>23<br>24<br>25<br>26<br>27<br>28<br>29<br>30<br>31<br>32<br>33<br>34<br>35<br>36<br>37<br>38<br>39<br>40<br>41<br>42<br>43<br>44<br>45<br>46<br>47<br>48<br>49<br>50<br>51<br>52<br>53<br>54<br>55<br>56<br>57<br>58<br>59<br>60 | <p>emergency medical physicians to patients with isolated limb injury. <i>Anaesthesia</i> 2016; 71: 779-87.</p> <p>Ellerton J, Paal P, Brugger H. Prehospital use of ketamine in mountain rescue. <i>EMJ</i> 2009; 26: 760-1.</p> <p>Fisher AD, Rippee B, Shehan H, Conklin C, Mabry RL. Prehospital analgesia with ketamine for combat wounds: a case series. <i>J Spec Oper Med</i> 2014; 14: 11-7.</p> <p>Galinski M, Hoffman L, Bregeaud D, Kamboua M, Ageron FX, Rouanet C, Hubert JC, Istria J, Ruscev M, Tazarourte K, Pevirieri F, Lapostolle F, Adnet F. Procedural sedation and analgesia in trauma patients in an out-of-hospital emergency setting: A prospective multicenter observational study. <i>Prehosp Emerg Care</i> 2018; 22: 497-505.</p> <p>Gausche-Hill M, Brown KM, Oliver ZJ, Sasson C, Dayan PS, Eschmann NM, Weik TS, Lawner BJ, Sahni R, Falck-Ytter Y, Wright JL, Todd K, Lang ES. An evidence-based guideline for prehospital analgesia in trauma. <i>Prehosp Emerg Care</i>; 18 25-34.</p> <p>Green SM, Roback MG, Krauss B, Brown L, McGlone RG, Agrawal D, McKee M, Weiss M, Pitetti RD, Hostetler MA, Wathen JE, Treston G, Garcia Pena BM, Gerber AC, Losek JD. Predictors of emesis and recovery agitation with emergency department ketamine sedation: an individual-patient data meta-analysis of 8,282 children. <i>Ann Emerg Med</i> 2009; 54: 171-80.</p> <p>Guldner GT, Petinaux B, Clemens P, Foster S, Antoine S. Ketamine for procedural sedation and analgesia by nonanesthesiologists in the field: a review for military health care providers. <i>Mil Med</i> 2006; 171: 484-90.</p> <p>Gurnani A, Sharma PK, Rautela RS, Bhattacharya A Analgesia for acute musculoskeletal trauma: low-dose subcutaneous infusion of ketamine. <i>Anaesth Intensive Care</i> 1996; 24: 32-6</p> <p>Henderson L. Special K for special situations. A review of ketamine for prehospital use. <i>JEMS</i> 2016; 41: 58-60.</p> | <p></p> <p>Letter</p> <p>Study design did not match the criteria</p> <p>Patient population did not match the criteria</p> <p>Study design did not match the criteria</p> <p>Patient population did not match the criteria</p> <p>Patient population did not match the criteria</p> <p>Study design did not match the criteria</p> |
|-------------------------------------------------------------------------------------------------------------------------------------------------------------------------------------------------------------------------------------------------------------------------------------------------------------------------------------------------------------|------------------------------------------------------------------------------------------------------------------------------------------------------------------------------------------------------------------------------------------------------------------------------------------------------------------------------------------------------------------------------------------------------------------------------------------------------------------------------------------------------------------------------------------------------------------------------------------------------------------------------------------------------------------------------------------------------------------------------------------------------------------------------------------------------------------------------------------------------------------------------------------------------------------------------------------------------------------------------------------------------------------------------------------------------------------------------------------------------------------------------------------------------------------------------------------------------------------------------------------------------------------------------------------------------------------------------------------------------------------------------------------------------------------------------------------------------------------------------------------------------------------------------------------------------------------------------------------------------------------------------------------------------------------------------------------------------------------------------------------------------------------------------------------------------------------------------------------------------------------------------------------------------------------------------------------------------------------|-----------------------------------------------------------------------------------------------------------------------------------------------------------------------------------------------------------------------------------------------------------------------------------------------------------------------------------|

|                                                                                                                                                                                                                                                                                                         |                                                |
|---------------------------------------------------------------------------------------------------------------------------------------------------------------------------------------------------------------------------------------------------------------------------------------------------------|------------------------------------------------|
| <p>Hossfeld B, Holstrater S, Bernhard M, Lampl L, Helm M, Kulla M. Prehospital analgesia in adults. <i>Anesthesiol Intensivmed Notfallmed Schmerzther</i> 2016; 51: 84-96.</p>                                                                                                                          | <p>Excluded due to language restrictions</p>   |
| <p>Iqbal M, Spaight PA, Siriwardena AN. Patients' and emergency clinicians' perceptions of improving pre-hospital pain management: A qualitative study. <i>EMJ</i> 2013; 30: e18.</p>                                                                                                                   | <p>Ketamine not central in the text</p>        |
| <p>Jansen A, Boyle M. Prehospital pain relief, where are we now? A review of the literature. <i>Australas J Paramed</i> 2014; 11: 20.</p>                                                                                                                                                               | <p>Ketamine not central in the text</p>        |
| <p>Jennings PA, Cameron P, Bernard S. Ketamine as an analgesic in the pre-hospital setting: a systematic review. <i>Acta Anaesthesiol Scand</i> 2011; 55: 638-43.</p>                                                                                                                                   | <p>Study design did not match the criteria</p> |
| <p>Jennings PA, Cameron P, Bernard S. Determinants of clinically important pain severity reduction in the prehospital setting. <i>EMJ</i> 2012; 29: 333-34.</p>                                                                                                                                         | <p>Ketamine not central in the text</p>        |
| <p>Jennings PA, Cameron P, Bernard S, Walker T, Jolley D, Fitzgerald M, Masci K. Long-term pain prevalence and health-related quality of life outcomes for patients enrolled in a ketamine versus morphine for prehospital traumatic pain randomised controlled trial. <i>EMJ</i> 2014; 31: 840-43.</p> | <p>Setting did not match the criteria</p>      |
| <p>Jennings PA, Cameron P, Bernard SA, Walker T, Fitzgerald M, Masci K. Ketamine is superior to morphine alone for the management of traumatic pain in the prehospital setting: A randomised controlled trial. <i>Emerg Med Australas</i> 2012; 24: 19.</p>                                             | <p>Letter</p>                                  |
| <p>Johansson J, Sjoberg J, Nordgren M, Sandstrom E, Sjoberg F, Zetterstrom H. Prehospital analgesia using nasal administration of S-ketamine--a case series. <i>Scand J Trauma Resusc Emerg Med</i> 2013; 21: 38.</p>                                                                                   | <p>Study design did not match the criteria</p> |
| <p>Kovar JL, Gleisberg GR, Ardeel ER, Basnawi A, Escott MEA. Hemodynamic changes in patients receiving ketamine sedation by emergency medical services. <i>Acad Emerg Med</i> 2012; 19: S87.</p>                                                                                                        | <p>Study design did not match the criteria</p> |



|                                        |                                                                                                                                                                                                                                            |                                         |
|----------------------------------------|--------------------------------------------------------------------------------------------------------------------------------------------------------------------------------------------------------------------------------------------|-----------------------------------------|
| 1<br>2<br>3<br>4<br>5<br>6<br>7        | Lovrinčević M, Kotob F, Santarosa J. Pain management in the trauma setting. <i>Semin Anesth Perioper Med Pain</i> 2005; 24: 34-40.                                                                                                         | Setting did not match the criteria      |
| 8<br>9<br>10<br>11<br>12               | Madeira F, Ferreira P, Lapa T, Tavares E. Prehospital pain management: Do we have to learn more about it? <i>Eur J Anaesthesiol</i> 2013; 30: 203-04.                                                                                      | Ketamine not central in the text        |
| 13<br>14<br>15<br>16<br>17<br>18       | Marland S, Ellerton J, Andolfatto G, Strapazzon G, Thomassen O, Brandner B, Weatherall A, Paal P. Ketamine: Use in anesthesia. <i>CNS Neurosci Ther</i> 2013; 19: 381-89.                                                                  | Setting did not match the criteria      |
| 19<br>20<br>21<br>22<br>23<br>24<br>25 | McKay WP. Intravenous analgesia for out-of-hospital traumatic pain in adults: ketamine gives a greater reduction in pain than morphine but causes more adverse effects. <i>Evid Based Nurs</i> 2013; 16: 58-9.                             | Letter                                  |
| 26<br>27<br>28<br>29<br>30<br>31<br>32 | McQueen C, Crombie N, Cormack S, Wheaton S. Prehospital use of ketamine for analgesia and procedural sedation by critical care paramedics in the UK: A note of caution? <i>EMJ</i> 2014; 31: 1029.                                         | Letter                                  |
| 33<br>34<br>35<br>36<br>37             | Moy R, Wright C. Ketamine for military prehospital analgesia and sedation in combat casualties. <i>J R Army Med Corps</i> 2018; 164: 436-37.                                                                                               | Study design did not match the criteria |
| 38<br>39<br>40<br>41                   | Moy RJ, Le Clerc S. Ketamine in prehospital analgesia and anaesthesia. <i>Trends Anaesth Crit Care</i> 2011; 1: 243-45.                                                                                                                    | Study design did not match the criteria |
| 42<br>43<br>44<br>45<br>46<br>47       | Petz LN, Tyner S, Barnard E, Ervin A, Mora A, Clifford J, Fowler M, Bebartá VS. Prehospital and en route analgesic use in the combat setting: a prospectively designed, multicenter, observational study. <i>Mil Med</i> 2015; 180: 14-18. | Study design did not match the criteria |
| 48<br>49<br>50<br>51                   | Porter K. Ketamine in prehospital care. <i>EMJ</i> 2004; 21: 351-4.                                                                                                                                                                        | Study design did not match the criteria |
| 52<br>53<br>54<br>55<br>56             | Radvansky BM, Puri S, Sifonios AN, Eloy JD, Le V. Ketamine-a narrative review of its uses in medicine. <i>Am J Ther</i> 2016; 23: e1414-e26.                                                                                               | Study design did not match the criteria |
| 57<br>58<br>59<br>60                   | Schauer SG, Mora AG, Maddry JK, Bebartá VS. Multicenter, prospective study of prehospital administration of analgesia in                                                                                                                   | Study design did not match the criteria |

|                                                    |                                                                                                                                                                                                                                                                           |                                               |
|----------------------------------------------------|---------------------------------------------------------------------------------------------------------------------------------------------------------------------------------------------------------------------------------------------------------------------------|-----------------------------------------------|
| 1<br>2<br>3<br>4<br>5<br>6                         | the U.S. combat theater of Afghanistan. <i>Prehosp Emerg Care</i> 2017; 21: 744-49.                                                                                                                                                                                       |                                               |
| 7<br>8<br>9<br>10<br>11<br>12<br>13<br>14          | Schonenberg M, Reichwald U, Domes G, Badke A, Hautzinger M. Effects of peritraumatic ketamine medication on early and sustained posttraumatic stress symptoms in moderately injured accident victims. <i>Psychopharmacology (Berl)</i> 2005; 182: 420-5.                  | Study design did not match the criteria       |
| 15<br>16<br>17<br>18                               | Scott S, Paul B. UK and Victorian, Acute pain guidelines compared. <i>Australas J Paramed</i> 2013; 10: 32.                                                                                                                                                               | Letter                                        |
| 19<br>20<br>21<br>22<br>23                         | Steel A, Wharton R, Bates A, French J, Lewis S, Mackenzie R. Ketamine use in prehospital critical care. <i>EMJ</i> 2008; 25: 618-19.                                                                                                                                      | Letter                                        |
| 24<br>25<br>26<br>27                               | Svenson JE, Abernathy MK. Ketamine for prehospital use: new look at an old drug. <i>Am J Emerg Med</i> 2007; 25: 977-80.                                                                                                                                                  | Patient population did not match the criteria |
| 28<br>29<br>30                                     | Wedmore IS, Butler FK. Battlefield analgesia in tactical combat casualty care. <i>Wilderness Environ Med</i> 2017; 28: S109-S16.                                                                                                                                          | Study design did not match the criteria       |
| 31<br>32<br>33                                     | Wood PR. Ketamine: Prehospital and in-hospital use. <i>Trauma</i> 2003; 5: 137-40.                                                                                                                                                                                        | Study design did not match the criteria       |
| 34<br>35<br>36<br>37<br>38<br>39<br>40<br>41<br>42 | Zhang M, Cowan T, Smiles JP, Morgan M, Armstrong J, Goswami C, Sewell C. Prehospital analgesic choice in injured patients does not impact on rates of vomiting: Experience from a New South Wales primary retrieval service. <i>Emerg Med Australas</i> 2017; 30: 406-11. | Study design did not match the criteria       |

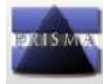

# PRISMA 2009 Checklist

| Section/topic                      | #  | Checklist item                                                                                                                                                                                                                                                                                              | Reported on page # |
|------------------------------------|----|-------------------------------------------------------------------------------------------------------------------------------------------------------------------------------------------------------------------------------------------------------------------------------------------------------------|--------------------|
| <b>TITLE</b>                       |    |                                                                                                                                                                                                                                                                                                             |                    |
| Title                              | 1  | Identify the report as a systematic review, meta-analysis, or both.                                                                                                                                                                                                                                         | 1                  |
| <b>ABSTRACT</b>                    |    |                                                                                                                                                                                                                                                                                                             |                    |
| Structured summary                 | 2  | Provide a structured summary including, as applicable: background; objectives; data sources; study eligibility criteria, participants, and interventions; study appraisal and synthesis methods; results; limitations; conclusions and implications of key findings; systematic review registration number. | 2                  |
| <b>INTRODUCTION</b>                |    |                                                                                                                                                                                                                                                                                                             |                    |
| Rationale                          | 3  | Describe the rationale for the review in the context of what is already known.                                                                                                                                                                                                                              | 4                  |
| Objectives                         | 4  | Provide an explicit statement of questions being addressed with reference to participants, interventions, comparisons, outcomes, and study design (PICOS).                                                                                                                                                  | 6                  |
| <b>METHODS</b>                     |    |                                                                                                                                                                                                                                                                                                             |                    |
| Protocol and registration          | 5  | Indicate if a review protocol exists, if and where it can be accessed (e.g., Web address), and, if available, provide registration information including registration number.                                                                                                                               | 6                  |
| Eligibility criteria               | 6  | Specify study characteristics (e.g., PICOS, length of follow-up) and report characteristics (e.g., years considered, language, publication status) used as criteria for eligibility, giving rationale.                                                                                                      | 6                  |
| Information sources                | 7  | Describe all information sources (e.g., databases with dates of coverage, contact with study authors to identify additional studies) in the search and date last searched.                                                                                                                                  | 7                  |
| Search                             | 8  | Present full electronic search strategy for at least one database, including any limits used, such that it could be repeated.                                                                                                                                                                               | A 1                |
| Study selection                    | 9  | State the process for selecting studies (i.e., screening, eligibility, included in systematic review, and, if applicable, included in the meta-analysis).                                                                                                                                                   | 6                  |
| Data collection process            | 10 | Describe method of data extraction from reports (e.g., piloted forms, independently, in duplicate) and any processes for obtaining and confirming data from investigators.                                                                                                                                  | 8                  |
| Data items                         | 11 | List and define all variables for which data were sought (e.g., PICOS, funding sources) and any assumptions and simplifications made.                                                                                                                                                                       | 8                  |
| Risk of bias in individual studies | 12 | Describe methods used for assessing risk of bias of individual studies (including specification of whether this was done at the study or outcome level), and how this information is to be used in any data synthesis.                                                                                      | 7+8                |
| Summary measures                   | 13 | State the principal summary measures (e.g., risk ratio, difference in means).                                                                                                                                                                                                                               | 8                  |
| Synthesis of results               | 14 | Describe the methods of handling data and combining results of studies, if done, including measures of consistency (e.g., I <sup>2</sup> ) for each meta-analysis.                                                                                                                                          | 8                  |



# PRISMA 2009 Checklist

Page 1 of 2

| Section/topic                 | #  | Checklist item                                                                                                                                                                                           | Reported on page # |
|-------------------------------|----|----------------------------------------------------------------------------------------------------------------------------------------------------------------------------------------------------------|--------------------|
| Risk of bias across studies   | 15 | Specify any assessment of risk of bias that may affect the cumulative evidence (e.g., publication bias, selective reporting within studies).                                                             | 8                  |
| Additional analyses           | 16 | Describe methods of additional analyses (e.g., sensitivity or subgroup analyses, meta-regression), if done, indicating which were pre-specified.                                                         | 8                  |
| <b>RESULTS</b>                |    |                                                                                                                                                                                                          |                    |
| Study selection               | 17 | Give numbers of studies screened, assessed for eligibility, and included in the review, with reasons for exclusions at each stage, ideally with a flow diagram.                                          | 9                  |
| Study characteristics         | 18 | For each study, present characteristics for which data were extracted (e.g., study size, PICOS, follow-up period) and provide the citations.                                                             | 10+11+12           |
| Risk of bias within studies   | 19 | Present data on risk of bias of each study and, if available, any outcome level assessment (see item 12).                                                                                                | Fig 2              |
| Results of individual studies | 20 | For all outcomes considered (benefits or harms), present, for each study: (a) simple summary data for each intervention group (b) effect estimates and confidence intervals, ideally with a forest plot. | Fig 3-8            |
| Synthesis of results          | 21 | Present results of each meta-analysis done, including confidence intervals and measures of consistency.                                                                                                  | Fig 3-8            |
| Risk of bias across studies   | 22 | Present results of any assessment of risk of bias across studies (see Item 15).                                                                                                                          | Fig 2              |
| Additional analysis           | 23 | Give results of additional analyses, if done (e.g., sensitivity or subgroup analyses, meta-regression [see Item 16]).                                                                                    | Fig 3-8            |
| <b>DISCUSSION</b>             |    |                                                                                                                                                                                                          |                    |
| Summary of evidence           | 24 | Summarize the main findings including the strength of evidence for each main outcome; consider their relevance to key groups (e.g., healthcare providers, users, and policy makers).                     | 14-16              |
| Limitations                   | 25 | Discuss limitations at study and outcome level (e.g., risk of bias), and at review-level (e.g., incomplete retrieval of identified research, reporting bias).                                            | 14-16              |
| Conclusions                   | 26 | Provide a general interpretation of the results in the context of other evidence, and implications for future research.                                                                                  | 14-16              |
| <b>FUNDING</b>                |    |                                                                                                                                                                                                          |                    |
| Funding                       | 27 | Describe sources of funding for the systematic review and other support (e.g., supply of data); role of funders for the systematic review.                                                               | 16                 |

From: Moher D, Liberati A, Tetzlaff J, Altman DG, The PRISMA Group (2009). Preferred Reporting Items for Systematic Reviews and Meta-Analyses: The PRISMA Statement. PLoS Med 6(6): e1000097. doi:10.1371/journal.pmed1000097

For more information, visit: [www.prisma-statement.org](http://www.prisma-statement.org).

Page 2 of 2

For peer review only - <http://bmjopen.bmj.com/site/about/guidelines.xhtml>
