# Supplementary material for: Ketamine for the treatment of prehospital acute pain: a systematic review of benefit and harm
Source: PubMed Central journal article supplement — BMJ Open. 2020 Nov 24;10(11):e038134. doi: 10.1136/bmjopen-2020-038134 (PMC7689093; doi:10.1136/bmjopen-2020-038134), 2020-11-24
Supplement: bmjopen-2020-038134supp001.pdf [file bmjopen-2020-038134supp001.pdf]

## SEARCH STRATEGIES

### PUBMED

- #1,"Search ketamine[Text Word]"
- #2,"Search analgesics, ketamine[Pharmacological Action]"
- #3,"Search ketamine[MeSH Terms]"
- #4,"Search (#1 OR #2 OR #3)"
- #5,"Search emergency medical services[MeSH Terms]"
- #6,"Search Ambulances[MeSH Terms]"
- #7,"Search Ambulance\*[Text Word]"
- #8,"Search Prehospital[Text Word]"
- #9,"Search Pre-hospital[Text Word]"
- #10,"Search out of hospital[Text Word]"
- #11,"Search Paramed\*[Text Word]"
- #12,"Search emergency medical technicians[MeSH Terms]"
- #13,"Search (#5 OR #6 OR #7 OR #8 OR #9 OR #10 OR #11 OR #12)"
- #14,"Search Danish[Language]"
- #15,"Search Norwegian[Language]"
- #16,"Search Swedish[Language]"
- #17,"Search English[Language]"
- #18,"Search (#14 OR #15 OR #16 OR #17)"
- #19,"Search (#4 AND #13 AND #18)"
- #20,"Search Animals[MeSH Terms]"
- #21,"Search Humans[MeSH Terms]"
- #22,"Search (#20 NOT #21)"
- #23,"Search (#19 NOT #22)"
- #24,"Search (""xxxx/xx/xx""[Date - Entrez]: ""xxxx/xx/xx""[Date - Entrez])"
- #25,"Search (#23 AND #24)"

### EMBASE

- #1, analgesic agent/
- #2, ketamine.m. \_titl.
- #3, rescue personnel/
- #4, ambulance/
- #5, emergency health service/
- #6, "emergency medical technician\*".ab.ti.
- #7, "emergency responder\*".ab.ti.
- #8, rescue service. ab.ti.
- #9, "Paramed\*". ab.ti.
- #10, "ambulance\*". ab.ti.
- #11, pre-hospital. ab.ti.
- #12, prehospital. ab.ti.
- #13, out-of-hospital. ab.ti.
- #14, or/3-13
- #15, or/1-2
- #16, and/14-15

### Cochrane Library

- #1 MeSH descriptor: [Ketamine] explode all trees
- #2 MeSH descriptor: [Emergency Medical Technicians] explode all trees
- #3 MeSH descriptor: [Ambulances] explode all trees
- #4 paramed\*
- #5 out-of-hospital
- #6, pre-hospital
- #7, prehospita
- #8, ambulance\*
- #9, #2 OR #3 OR #4 OR #5 OR #6 OR #7 OR #8
- #10, #1 AND # 9

### Epistemonikos

(title:((title:(prehospital OR pre-hospital OR out-of-hospital OR ambulance\* OR “emergency medical technicians” OR “emergency medical service\*”) OR abstract:(prehospital OR pre-hospital OR out-of-hospital OR ambulance\* OR “emergency medical technicians” OR “emergency medical service\*”)) AND (title:(ketamin\*) OR abstract:(ketamin\*)))
